# Supplementary material for: Transcriptome and comparative gene expression analysis of Phyllostachys edulis in response to high light
Source: BMC Plant Biol. 2016 Jan 28;16:34. doi: 10.1186/s12870-016-0720-9 (PMC4730629; doi:10.1186/s12870-016-0720-9)
Supplement: Additional file 3: — The list of expressed genes with FPKM ≥1 in Venn diagram. (XLSX 289 kb) [file 12870_2016_720_MOESM3_ESM.xlsx]

## Sheet: overview
	Supplementary File 4. The list of expressed genes with FPKM ≥1 in Venn diagram

## Sheet: "8H", "0.5H" and "CK"
	19059 common elements in "8H", "0.5H" and "CK":
	PH01000000G0410
	PH01000000G0480
	PH01000000G0500
	PH01000000G0540
	PH01000000G0550
	PH01000000G0560
	PH01000000G0670
	PH01000000G0700
	PH01000000G0710
	PH01000000G0800
	PH01000000G0910
	PH01000000G0960
	PH01000000G0970
	PH01000000G0980
	PH01000000G1020
	PH01000000G1160
	PH01000000G1200
	PH01000000G1220
	PH01000000G1330
	PH01000000G1400
	PH01000000G1430
	PH01000000G1660
	PH01000000G1710
	PH01000000G1840
	PH01000000G2000
	PH01000000G2050
	PH01000000G2190
	PH01000000G2200
	PH01000000G2220
	PH01000000G2260
	PH01000000G2340
	PH01000000G2350
	PH01000000G2800
	PH01000000G2970
	PH01000000G3250
	PH01000000G3310
	PH01000000G3550
	PH01000000G3700
	PH01000000G3760
	PH01000000G3800
	PH01000000G3810
	PH01000000G4160
	PH01000000G4340
	PH01000000G4360
	PH01000000G4500
	PH01000000G4530
	PH01000000G4700
	PH01000000G4870
	PH01000000G4910
	PH01000000G4920
	PH01000000G4930
	PH01000000G5090
	PH01000000G5130
	PH01000000G5190
	PH01000000G5370
	PH01000000G5430
	PH01000000G5700
	PH01000000G5710
	PH01000000G5850
	PH01000000G5860
	PH01000000G5980
	PH01000000G6020
	PH01000000G6400
	PH01000000G6460
	PH01000000G6470
	PH01000000G6760
	PH01000000G6800
	PH01000000G7050
	PH01000000G7120
	PH01000000G7190
	PH01000000G7210
	PH01000000G7300
	PH01000000G7320
	PH01000000G7400
	PH01000001G0110
	PH01000001G0140
	PH01000001G0190
	PH01000001G0200
	PH01000001G0710
	PH01000001G0800
	PH01000001G0820
	PH01000001G0880
	PH01000001G0900
	PH01000001G1270
	PH01000001G1290
	PH01000001G1450
	PH01000001G1770
	PH01000001G1780
	PH01000001G1810
	PH01000001G2010
	PH01000001G2030
	PH01000001G2110
	PH01000001G2250
	PH01000001G2300
	PH01000001G2310
	PH01000001G2410
	PH01000001G2560
	PH01000001G2570
	PH01000001G2580
	PH01000001G2590
	PH01000001G2600
	PH01000001G2610
	PH01000001G2800
	PH01000001G2850
	PH01000001G2870
	PH01000001G2930
	PH01000001G2940
	PH01000001G3180
	PH01000001G3190
	PH01000001G3260
	PH01000001G3350
	PH01000001G3470
	PH01000001G3500
	PH01000001G3600
	PH01000001G3650
	PH01000001G4050
	PH01000001G4440
	PH01000001G4450
	PH01000001G4480
	PH01000001G4490
	PH01000001G4520
	PH01000001G4670
	PH01000001G4680
	PH01000001G5130
	PH01000001G5360
	PH01000002G0050
	PH01000002G0130
	PH01000002G0240
	PH01000002G0310
	PH01000002G0320
	PH01000002G0490
	PH01000002G0540
	PH01000002G0640
	PH01000002G0720
	PH01000002G0760
	PH01000002G0950
	PH01000002G1150
	PH01000002G1250
	PH01000002G1270
	PH01000002G1400
	PH01000002G1670
	PH01000002G1850
	PH01000002G1960
	PH01000002G2090
	PH01000002G2210
	PH01000002G2300
	PH01000002G2380
	PH01000002G2470
	PH01000002G2500
	PH01000002G2510
	PH01000002G2620
	PH01000002G2670
	PH01000002G2720
	PH01000002G2740
	PH01000002G2790
	PH01000002G2830
	PH01000002G2860
	PH01000002G3110
	PH01000002G3170
	PH01000002G3240
	PH01000002G3260
	PH01000002G3290
	PH01000002G3370
	PH01000002G3460
	PH01000002G3470
	PH01000002G3590
	PH01000002G3730
	PH01000002G3860
	PH01000002G3910
	PH01000002G3920
	PH01000002G3990
	PH01000002G4080
	PH01000002G4150
	PH01000002G4180
	PH01000002G4240
	PH01000002G4250
	PH01000002G4340
	PH01000003G0060
	PH01000003G0200
	PH01000003G0390
	PH01000003G0400
	PH01000003G0420
	PH01000003G0430
	PH01000003G0470
	PH01000003G0620
	PH01000003G0730
	PH01000003G0780
	PH01000003G0790
	PH01000003G0840
	PH01000003G0860
	PH01000003G0910
	PH01000003G1050
	PH01000003G1230
	PH01000003G1680
	PH01000003G1780
	PH01000003G1890
	PH01000003G1900
	PH01000003G2020
	PH01000003G2040
	PH01000003G2120
	PH01000003G2320
	PH01000003G2570
	PH01000003G2650
	PH01000003G2710
	PH01000003G3040
	PH01000003G3120
	PH01000003G3180
	PH01000003G3390
	PH01000003G3550
	PH01000003G3560
	PH01000003G3570
	PH01000003G3590
	PH01000003G3650
	PH01000003G3670
	PH01000003G3690
	PH01000003G3730
	PH01000003G3770
	PH01000003G4010
	PH01000003G4180
	PH01000003G4200
	PH01000003G4210
	PH01000003G4260
	PH01000004G0040
	PH01000004G0130
	PH01000004G0140
	PH01000004G0650
	PH01000004G0740
	PH01000004G0870
	PH01000004G0950
	PH01000004G0980
	PH01000004G1010
	PH01000004G1040
	PH01000004G1210
	PH01000004G1260
	PH01000004G1570
	PH01000004G1580
	PH01000004G1680
	PH01000004G1720
	PH01000004G1840
	PH01000004G1860
	PH01000004G2190
	PH01000004G2200
	PH01000004G2550
	PH01000004G2710
	PH01000004G2830
	PH01000004G2930
	PH01000004G3020
	PH01000004G3030
	PH01000004G3040
	PH01000004G3230
	PH01000004G3560
	PH01000004G3970
	PH01000004G4070
	PH01000004G4100
	PH01000004G4410
	PH01000004G4470
	PH01000005G0310
	PH01000005G0330
	PH01000005G0400
	PH01000005G0450
	PH01000005G0500
	PH01000005G0510
	PH01000005G0580
	PH01000005G0960
	PH01000005G0970
	PH01000005G1020
	PH01000005G1030
	PH01000005G1170
	PH01000005G1180
	PH01000005G1200
	PH01000005G1210
	PH01000005G1220
	PH01000005G1230
	PH01000005G1390
	PH01000005G1420
	PH01000005G1450
	PH01000005G1770
	PH01000005G1790
	PH01000005G1800
	PH01000005G1820
	PH01000005G1830
	PH01000005G2010
	PH01000005G2020
	PH01000005G2030
	PH01000005G2110
	PH01000005G2160
	PH01000005G2200
	PH01000005G2210
	PH01000005G2240
	PH01000005G2310
	PH01000005G2340
	PH01000005G2360
	PH01000005G2470
	PH01000005G2480
	PH01000005G2540
	PH01000005G2550
	PH01000005G2560
	PH01000005G2590
	PH01000005G2820
	PH01000005G2870
	PH01000005G2890
	PH01000005G3020
	PH01000005G3030
	PH01000005G3110
	PH01000005G3140
	PH01000005G3210
	PH01000005G3220
	PH01000005G3390
	PH01000005G3400
	PH01000005G3500
	PH01000005G3600
	PH01000005G3620
	PH01000005G3640
	PH01000005G3710
	PH01000005G3860
	PH01000005G4060
	PH01000005G4070
	PH01000005G4150
	PH01000006G0350
	PH01000006G0380
	PH01000006G0390
	PH01000006G0430
	PH01000006G0450
	PH01000006G0460
	PH01000006G0610
	PH01000006G0760
	PH01000006G0810
	PH01000006G0910
	PH01000006G0920
	PH01000006G0940
	PH01000006G1030
	PH01000006G1150
	PH01000006G1420
	PH01000006G1440
	PH01000006G1670
	PH01000006G2010
	PH01000006G2340
	PH01000006G2370
	PH01000006G2390
	PH01000006G2400
	PH01000006G2410
	PH01000006G2600
	PH01000006G2790
	PH01000006G3040
	PH01000006G3200
	PH01000006G3240
	PH01000006G3340
	PH01000006G3360
	PH01000006G3520
	PH01000006G3670
	PH01000007G0890
	PH01000007G1150
	PH01000007G1340
	PH01000007G1470
	PH01000007G1740
	PH01000007G1750
	PH01000007G1880
	PH01000007G1960
	PH01000007G2100
	PH01000007G2380
	PH01000007G2390
	PH01000007G2400
	PH01000007G2410
	PH01000007G2600
	PH01000007G2620
	PH01000007G2760
	PH01000007G2860
	PH01000007G2920
	PH01000007G3010
	PH01000007G3150
	PH01000007G3320
	PH01000007G3570
	PH01000007G3610
	PH01000007G3680
	PH01000008G0500
	PH01000008G0920
	PH01000008G1140
	PH01000008G1310
	PH01000008G1530
	PH01000008G1540
	PH01000008G2080
	PH01000008G2090
	PH01000008G2130
	PH01000008G2140
	PH01000008G2210
	PH01000008G2370
	PH01000008G2420
	PH01000008G2470
	PH01000008G2700
	PH01000008G2960
	PH01000008G3080
	PH01000008G3210
	PH01000009G0030
	PH01000009G0060
	PH01000009G0150
	PH01000009G0160
	PH01000009G0260
	PH01000009G0300
	PH01000009G0350
	PH01000009G0360
	PH01000009G0410
	PH01000009G0430
	PH01000009G0510
	PH01000009G0530
	PH01000009G0540
	PH01000009G0590
	PH01000009G0600
	PH01000009G0810
	PH01000009G0830
	PH01000009G0870
	PH01000009G0970
	PH01000009G1080
	PH01000009G1200
	PH01000009G1230
	PH01000009G1240
	PH01000009G1330
	PH01000009G1450
	PH01000009G1510
	PH01000009G1800
	PH01000009G1900
	PH01000009G2100
	PH01000009G2130
	PH01000009G2140
	PH01000009G2290
	PH01000009G2360
	PH01000009G2390
	PH01000009G2500
	PH01000009G2590
	PH01000009G2680
	PH01000009G2840
	PH01000009G2950
	PH01000009G3360
	PH01000010G0100
	PH01000010G0140
	PH01000010G0220
	PH01000010G0280
	PH01000010G0320
	PH01000010G0350
	PH01000010G0460
	PH01000010G0640
	PH01000010G0730
	PH01000010G0740
	PH01000010G0760
	PH01000010G0990
	PH01000010G1020
	PH01000010G1090
	PH01000010G1120
	PH01000010G1130
	PH01000010G1410
	PH01000010G1470
	PH01000010G1560
	PH01000010G1590
	PH01000010G1610
	PH01000010G2010
	PH01000010G2350
	PH01000010G2470
	PH01000010G2480
	PH01000010G2530
	PH01000010G2550
	PH01000010G2650
	PH01000010G2680
	PH01000010G2770
	PH01000010G3030
	PH01000010G3080
	PH01000010G3100
	PH01000010G3150
	PH01000010G3180
	PH01000011G0130
	PH01000011G0270
	PH01000011G1110
	PH01000011G1210
	PH01000011G1270
	PH01000011G1330
	PH01000011G1350
	PH01000011G1390
	PH01000011G1470
	PH01000011G1610
	PH01000011G1700
	PH01000011G1730
	PH01000011G1880
	PH01000011G1890
	PH01000011G1900
	PH01000011G1960
	PH01000011G1970
	PH01000011G2050
	PH01000011G2080
	PH01000011G2100
	PH01000011G2110
	PH01000011G2120
	PH01000011G2340
	PH01000011G2670
	PH01000011G2710
	PH01000011G2810
	PH01000011G2980
	PH01000011G2990
	PH01000011G3000
	PH01000011G3020
	PH01000012G0070
	PH01000012G0140
	PH01000012G0150
	PH01000012G0160
	PH01000012G0330
	PH01000012G0400
	PH01000012G0420
	PH01000012G0490
	PH01000012G0560
	PH01000012G0660
	PH01000012G0700
	PH01000012G0750
	PH01000012G0830
	PH01000012G0930
	PH01000012G0960
	PH01000012G1060
	PH01000012G1090
	PH01000012G1160
	PH01000012G1170
	PH01000012G1250
	PH01000012G1330
	PH01000012G1530
	PH01000012G1620
	PH01000012G1630
	PH01000012G1640
	PH01000012G1880
	PH01000012G1890
	PH01000012G1900
	PH01000012G1930
	PH01000012G2000
	PH01000012G2150
	PH01000012G2160
	PH01000012G2230
	PH01000012G2270
	PH01000012G2360
	PH01000012G2370
	PH01000012G2420
	PH01000012G2490
	PH01000012G2610
	PH01000012G2620
	PH01000012G2650
	PH01000012G2690
	PH01000012G2960
	PH01000013G0080
	PH01000013G0090
	PH01000013G0130
	PH01000013G0260
	PH01000013G0420
	PH01000013G0550
	PH01000013G0830
	PH01000013G0860
	PH01000013G1020
	PH01000013G1030
	PH01000013G1080
	PH01000013G1120
	PH01000013G1210
	PH01000013G1330
	PH01000013G1480
	PH01000013G1500
	PH01000013G1690
	PH01000013G1830
	PH01000013G1920
	PH01000013G1960
	PH01000013G2230
	PH01000013G2240
	PH01000013G2450
	PH01000013G2480
	PH01000013G2540
	PH01000013G2600
	PH01000013G2610
	PH01000013G2620
	PH01000013G2740
	PH01000014G0030
	PH01000014G0040
	PH01000014G0070
	PH01000014G0090
	PH01000014G0130
	PH01000014G0180
	PH01000014G0210
	PH01000014G0220
	PH01000014G0340
	PH01000014G0360
	PH01000014G0390
	PH01000014G0460
	PH01000014G0470
	PH01000014G0560
	PH01000014G0610
	PH01000014G0960
	PH01000014G0990
	PH01000014G1010
	PH01000014G1060
	PH01000014G1100
	PH01000014G1170
	PH01000014G1270
	PH01000014G1320
	PH01000014G1340
	PH01000014G1630
	PH01000014G2100
	PH01000014G2120
	PH01000014G2340
	PH01000014G2470
	PH01000014G2580
	PH01000014G2660
	PH01000014G2680
	PH01000015G0080
	PH01000015G0090
	PH01000015G0190
	PH01000015G0220
	PH01000015G0260
	PH01000015G0350
	PH01000015G0530
	PH01000015G0610
	PH01000015G0650
	PH01000015G1320
	PH01000015G1390
	PH01000015G1480
	PH01000015G1490
	PH01000015G1560
	PH01000015G1970
	PH01000015G2020
	PH01000015G2030
	PH01000015G2060
	PH01000015G2130
	PH01000015G2210
	PH01000015G2420
	PH01000015G2480
	PH01000015G2590
	PH01000015G2600
	PH01000015G2630
	PH01000015G2650
	PH01000015G2730
	PH01000015G2760
	PH01000015G2850
	PH01000016G0110
	PH01000016G0530
	PH01000016G0540
	PH01000016G0560
	PH01000016G0600
	PH01000016G0660
	PH01000016G0700
	PH01000016G0730
	PH01000016G1030
	PH01000016G1040
	PH01000016G1050
	PH01000016G1090
	PH01000016G1150
	PH01000016G1190
	PH01000016G1570
	PH01000016G1580
	PH01000016G1650
	PH01000016G1870
	PH01000017G0030
	PH01000017G0070
	PH01000017G0080
	PH01000017G0370
	PH01000017G0390
	PH01000017G0420
	PH01000017G0440
	PH01000017G0720
	PH01000017G0730
	PH01000017G0740
	PH01000017G0870
	PH01000017G0880
	PH01000017G1110
	PH01000017G1130
	PH01000017G1140
	PH01000017G1210
	PH01000017G1220
	PH01000017G1420
	PH01000017G1500
	PH01000017G1560
	PH01000017G1840
	PH01000017G1880
	PH01000017G1940
	PH01000017G1950
	PH01000017G1970
	PH01000017G1990
	PH01000017G2160
	PH01000017G2230
	PH01000017G2260
	PH01000017G2310
	PH01000017G2400
	PH01000017G2410
	PH01000017G2520
	PH01000018G0120
	PH01000018G0140
	PH01000018G0160
	PH01000018G0310
	PH01000018G0370
	PH01000018G0580
	PH01000018G0590
	PH01000018G0620
	PH01000018G0630
	PH01000018G0640
	PH01000018G0660
	PH01000018G0710
	PH01000018G0750
	PH01000018G0760
	PH01000018G0810
	PH01000018G0830
	PH01000018G0850
	PH01000018G0890
	PH01000018G1060
	PH01000018G1270
	PH01000018G1810
	PH01000018G2000
	PH01000018G2140
	PH01000018G2350
	PH01000018G2430
	PH01000018G2470
	PH01000018G2550
	PH01000018G2640
	PH01000018G2720
	PH01000019G0200
	PH01000019G0220
	PH01000019G0260
	PH01000019G0310
	PH01000019G0430
	PH01000019G0450
	PH01000019G0470
	PH01000019G0480
	PH01000019G0530
	PH01000019G0570
	PH01000019G0580
	PH01000019G0750
	PH01000019G0770
	PH01000019G0810
	PH01000019G0830
	PH01000019G0870
	PH01000019G0910
	PH01000019G0990
	PH01000019G1090
	PH01000019G1100
	PH01000019G1110
	PH01000019G1140
	PH01000019G1260
	PH01000019G1310
	PH01000019G1400
	PH01000019G1410
	PH01000019G1430
	PH01000019G1480
	PH01000019G1490
	PH01000019G1600
	PH01000019G1620
	PH01000019G1700
	PH01000019G1710
	PH01000019G1720
	PH01000019G1730
	PH01000019G1740
	PH01000019G1770
	PH01000019G1840
	PH01000019G1850
	PH01000019G1890
	PH01000019G1930
	PH01000019G1940
	PH01000019G2080
	PH01000019G2100
	PH01000019G2160
	PH01000019G2180
	PH01000019G2190
	PH01000019G2200
	PH01000019G2230
	PH01000019G2270
	PH01000019G2280
	PH01000019G2290
	PH01000019G2350
	PH01000019G2400
	PH01000019G2510
	PH01000020G0010
	PH01000020G0020
	PH01000020G0070
	PH01000020G0120
	PH01000020G0270
	PH01000020G0320
	PH01000020G0360
	PH01000020G0420
	PH01000020G0430
	PH01000020G0500
	PH01000020G0790
	PH01000020G0980
	PH01000020G1010
	PH01000020G1160
	PH01000020G1250
	PH01000020G1300
	PH01000020G1330
	PH01000020G1340
	PH01000020G1370
	PH01000020G1380
	PH01000020G1390
	PH01000020G1440
	PH01000020G1490
	PH01000020G1570
	PH01000020G1620
	PH01000020G1640
	PH01000020G1650
	PH01000020G1700
	PH01000020G1730
	PH01000020G1790
	PH01000020G1840
	PH01000020G1860
	PH01000020G2160
	PH01000020G2220
	PH01000020G2230
	PH01000020G2300
	PH01000020G2630
	PH01000020G2640
	PH01000020G2710
	PH01000021G0020
	PH01000021G0050
	PH01000021G0060
	PH01000021G0220
	PH01000021G0280
	PH01000021G0290
	PH01000021G0480
	PH01000021G0560
	PH01000021G0680
	PH01000021G0700
	PH01000021G0720
	PH01000021G0780
	PH01000021G0790
	PH01000021G0800
	PH01000021G0830
	PH01000021G0990
	PH01000021G1070
	PH01000021G1090
	PH01000021G1200
	PH01000021G1240
	PH01000021G1280
	PH01000021G1320
	PH01000021G1350
	PH01000021G1440
	PH01000021G1460
	PH01000021G2170
	PH01000021G2400
	PH01000021G2410
	PH01000021G2480
	PH01000021G2500
	PH01000022G0140
	PH01000022G0640
	PH01000022G0660
	PH01000022G0840
	PH01000022G0990
	PH01000022G1030
	PH01000022G1070
	PH01000022G1820
	PH01000022G1870
	PH01000022G1910
	PH01000022G1920
	PH01000022G2020
	PH01000022G2070
	PH01000022G2160
	PH01000023G0150
	PH01000023G0250
	PH01000023G0480
	PH01000023G0490
	PH01000023G0560
	PH01000023G0640
	PH01000023G0830
	PH01000023G1110
	PH01000023G1230
	PH01000023G1280
	PH01000023G1300
	PH01000023G1400
	PH01000023G1420
	PH01000023G1450
	PH01000023G1520
	PH01000023G1710
	PH01000023G1730
	PH01000023G1920
	PH01000023G1950
	PH01000023G2040
	PH01000023G2080
	PH01000023G2110
	PH01000023G2170
	PH01000023G2660
	PH01000024G0160
	PH01000024G0250
	PH01000024G0390
	PH01000024G0400
	PH01000024G0410
	PH01000024G0440
	PH01000024G0850
	PH01000024G0940
	PH01000024G0980
	PH01000024G0990
	PH01000024G1000
	PH01000024G1030
	PH01000024G1060
	PH01000024G1190
	PH01000024G1210
	PH01000024G1270
	PH01000024G1340
	PH01000024G1360
	PH01000024G1380
	PH01000024G1490
	PH01000024G1530
	PH01000024G1560
	PH01000024G1630
	PH01000024G1770
	PH01000024G1910
	PH01000024G2010
	PH01000024G2210
	PH01000024G2290
	PH01000024G2370
	PH01000024G2430
	PH01000024G2550
	PH01000024G2570
	PH01000025G0040
	PH01000025G0210
	PH01000025G0480
	PH01000025G0550
	PH01000025G0600
	PH01000025G0610
	PH01000025G0790
	PH01000025G0810
	PH01000025G0840
	PH01000025G0860
	PH01000025G0890
	PH01000025G0920
	PH01000025G0930
	PH01000025G1080
	PH01000025G1090
	PH01000025G1120
	PH01000025G1140
	PH01000025G1170
	PH01000025G1180
	PH01000025G1210
	PH01000025G1260
	PH01000025G1330
	PH01000025G1400
	PH01000025G1450
	PH01000025G1810
	PH01000025G2120
	PH01000025G2130
	PH01000025G2190
	PH01000025G2230
	PH01000025G2260
	PH01000026G0020
	PH01000026G0040
	PH01000026G0130
	PH01000026G0180
	PH01000026G0210
	PH01000026G0220
	PH01000026G0280
	PH01000026G0340
	PH01000026G0350
	PH01000026G0390
	PH01000026G0400
	PH01000026G0490
	PH01000026G0510
	PH01000026G0620
	PH01000026G0660
	PH01000026G0720
	PH01000026G0730
	PH01000026G0880
	PH01000026G0890
	PH01000026G0900
	PH01000026G0980
	PH01000026G1030
	PH01000026G1060
	PH01000026G1190
	PH01000026G1260
	PH01000026G1270
	PH01000026G1290
	PH01000026G1400
	PH01000026G1450
	PH01000026G1490
	PH01000026G1530
	PH01000026G1560
	PH01000026G1630
	PH01000026G1700
	PH01000026G1720
	PH01000026G1780
	PH01000026G1860
	PH01000026G1950
	PH01000026G1980
	PH01000026G2010
	PH01000026G2100
	PH01000026G2110
	PH01000026G2170
	PH01000026G2310
	PH01000026G2380
	PH01000027G0270
	PH01000027G0750
	PH01000027G0760
	PH01000027G0800
	PH01000027G0820
	PH01000027G0920
	PH01000027G1370
	PH01000027G1390
	PH01000027G1530
	PH01000027G1540
	PH01000027G1830
	PH01000027G1900
	PH01000027G2140
	PH01000027G2150
	PH01000027G2350
	PH01000028G0070
	PH01000028G0160
	PH01000028G0260
	PH01000028G0330
	PH01000028G0540
	PH01000028G0690
	PH01000028G0810
	PH01000028G0890
	PH01000028G0900
	PH01000028G1160
	PH01000028G1170
	PH01000028G1180
	PH01000028G1280
	PH01000028G1290
	PH01000028G1310
	PH01000028G1320
	PH01000028G1330
	PH01000028G1380
	PH01000028G1400
	PH01000028G1450
	PH01000028G1470
	PH01000028G1480
	PH01000028G1610
	PH01000028G1770
	PH01000028G1790
	PH01000028G1910
	PH01000028G1930
	PH01000028G2090
	PH01000028G2140
	PH01000028G2150
	PH01000028G2160
	PH01000028G2330
	PH01000028G2350
	PH01000028G2440
	PH01000028G2550
	PH01000028G2610
	PH01000029G0070
	PH01000029G0270
	PH01000029G0340
	PH01000029G0360
	PH01000029G0500
	PH01000029G0520
	PH01000029G0650
	PH01000029G0710
	PH01000029G0960
	PH01000029G0970
	PH01000029G1280
	PH01000029G1290
	PH01000029G1330
	PH01000029G1340
	PH01000029G1610
	PH01000029G1730
	PH01000029G1740
	PH01000029G1950
	PH01000029G1970
	PH01000029G2070
	PH01000029G2160
	PH01000029G2170
	PH01000029G2250
	PH01000029G2270
	PH01000029G2390
	PH01000029G2400
	PH01000029G2440
	PH01000029G2510
	PH01000029G2540
	PH01000030G0050
	PH01000030G0210
	PH01000030G0260
	PH01000030G0460
	PH01000030G0890
	PH01000030G1020
	PH01000030G1080
	PH01000030G1240
	PH01000030G1340
	PH01000030G1420
	PH01000030G1490
	PH01000030G1580
	PH01000030G1730
	PH01000030G1770
	PH01000030G2230
	PH01000030G2390
	PH01000031G0300
	PH01000031G0320
	PH01000031G0380
	PH01000031G0390
	PH01000031G0410
	PH01000031G0480
	PH01000031G0500
	PH01000031G0750
	PH01000031G0760
	PH01000031G0840
	PH01000031G0910
	PH01000031G1210
	PH01000031G1260
	PH01000031G1370
	PH01000031G1420
	PH01000031G1690
	PH01000031G1740
	PH01000031G1760
	PH01000031G1840
	PH01000031G2080
	PH01000031G2090
	PH01000031G2110
	PH01000031G2300
	PH01000031G2350
	PH01000031G2360
	PH01000031G2370
	PH01000031G2430
	PH01000031G2510
	PH01000031G2530
	PH01000031G2680
	PH01000032G0070
	PH01000032G0530
	PH01000032G0550
	PH01000032G0980
	PH01000032G1030
	PH01000032G1340
	PH01000032G1490
	PH01000032G1530
	PH01000032G1540
	PH01000032G1630
	PH01000032G1640
	PH01000032G1740
	PH01000032G1870
	PH01000032G1990
	PH01000032G2010
	PH01000032G2080
	PH01000032G2150
	PH01000032G2590
	PH01000032G2670
	PH01000032G2710
	PH01000033G0230
	PH01000033G0270
	PH01000033G0310
	PH01000033G0440
	PH01000033G1510
	PH01000033G1580
	PH01000033G1790
	PH01000033G1800
	PH01000033G1890
	PH01000033G1930
	PH01000033G1960
	PH01000033G1970
	PH01000033G2090
	PH01000033G2110
	PH01000033G2130
	PH01000033G2170
	PH01000033G2190
	PH01000033G2260
	PH01000033G2300
	PH01000033G2380
	PH01000033G2440
	PH01000033G2450
	PH01000034G0070
	PH01000034G0340
	PH01000034G0680
	PH01000034G0840
	PH01000034G0990
	PH01000034G1070
	PH01000034G1230
	PH01000034G1380
	PH01000034G1730
	PH01000034G2180
	PH01000035G0110
	PH01000035G0280
	PH01000035G0370
	PH01000035G0390
	PH01000035G0470
	PH01000035G0620
	PH01000035G0630
	PH01000035G0690
	PH01000035G0710
	PH01000035G1070
	PH01000035G1280
	PH01000035G1400
	PH01000035G1520
	PH01000035G1530
	PH01000035G1640
	PH01000035G1780
	PH01000035G1890
	PH01000035G1950
	PH01000035G2170
	PH01000035G2280
	PH01000035G2370
	PH01000035G2440
	PH01000036G0080
	PH01000036G0110
	PH01000036G0260
	PH01000036G0320
	PH01000036G0350
	PH01000036G0470
	PH01000036G0540
	PH01000036G0620
	PH01000036G0640
	PH01000036G0740
	PH01000036G1110
	PH01000036G1140
	PH01000036G1180
	PH01000036G1230
	PH01000036G1480
	PH01000036G1560
	PH01000036G1580
	PH01000036G1710
	PH01000036G1820
	PH01000036G1850
	PH01000036G1880
	PH01000036G1930
	PH01000036G2010
	PH01000036G2060
	PH01000036G2070
	PH01000036G2080
	PH01000036G2090
	PH01000036G2220
	PH01000037G0050
	PH01000037G0060
	PH01000037G0250
	PH01000037G0330
	PH01000037G0340
	PH01000037G0430
	PH01000037G0480
	PH01000037G0650
	PH01000037G0690
	PH01000037G0740
	PH01000037G0830
	PH01000037G0880
	PH01000037G1230
	PH01000037G1270
	PH01000037G2010
	PH01000037G2100
	PH01000038G0110
	PH01000038G0170
	PH01000038G0270
	PH01000038G0320
	PH01000038G0330
	PH01000038G0390
	PH01000038G0470
	PH01000038G0510
	PH01000038G0560
	PH01000038G0590
	PH01000038G0730
	PH01000038G0780
	PH01000038G0790
	PH01000038G0840
	PH01000038G0910
	PH01000038G0930
	PH01000038G0990
	PH01000038G1340
	PH01000038G1400
	PH01000038G1530
	PH01000038G1550
	PH01000038G1650
	PH01000038G1730
	PH01000038G1750
	PH01000038G1840
	PH01000038G2100
	PH01000038G2180
	PH01000038G2210
	PH01000039G0180
	PH01000039G0390
	PH01000039G0530
	PH01000039G0640
	PH01000039G0870
	PH01000039G1360
	PH01000039G1370
	PH01000039G1570
	PH01000039G1740
	PH01000040G0080
	PH01000040G0090
	PH01000040G0140
	PH01000040G0150
	PH01000040G0210
	PH01000040G0270
	PH01000040G0280
	PH01000040G0360
	PH01000040G0370
	PH01000040G0430
	PH01000040G0490
	PH01000040G0590
	PH01000040G0610
	PH01000040G0670
	PH01000040G0790
	PH01000040G0830
	PH01000040G0870
	PH01000040G0880
	PH01000040G0970
	PH01000040G1070
	PH01000040G1100
	PH01000040G1230
	PH01000040G1260
	PH01000040G1360
	PH01000040G1370
	PH01000040G1390
	PH01000040G1480
	PH01000040G1560
	PH01000040G1590
	PH01000040G1680
	PH01000040G1720
	PH01000040G1760
	PH01000040G1880
	PH01000040G1920
	PH01000040G2000
	PH01000040G2010
	PH01000040G2040
	PH01000040G2070
	PH01000040G2090
	PH01000040G2100
	PH01000040G2170
	PH01000040G2330
	PH01000041G0010
	PH01000041G0060
	PH01000041G0120
	PH01000041G0180
	PH01000041G0200
	PH01000041G0270
	PH01000041G0290
	PH01000041G0400
	PH01000041G0480
	PH01000041G0570
	PH01000041G0700
	PH01000041G0760
	PH01000041G0770
	PH01000041G0930
	PH01000041G0960
	PH01000041G0980
	PH01000041G1140
	PH01000041G1200
	PH01000041G1270
	PH01000041G1300
	PH01000041G1310
	PH01000041G1330
	PH01000041G1340
	PH01000041G1500
	PH01000041G1530
	PH01000041G1650
	PH01000041G1710
	PH01000041G1720
	PH01000041G1770
	PH01000041G1830
	PH01000041G1890
	PH01000041G2140
	PH01000041G2170
	PH01000041G2180
	PH01000041G2190
	PH01000041G2300
	PH01000042G0300
	PH01000042G0690
	PH01000042G0730
	PH01000042G0880
	PH01000042G0920
	PH01000042G0980
	PH01000042G1220
	PH01000042G1230
	PH01000042G1280
	PH01000042G1290
	PH01000042G1430
	PH01000042G1600
	PH01000042G1610
	PH01000042G1710
	PH01000042G1750
	PH01000042G1900
	PH01000042G2020
	PH01000042G2190
	PH01000042G2220
	PH01000042G2250
	PH01000042G2270
	PH01000042G2280
	PH01000042G2310
	PH01000043G0030
	PH01000043G0170
	PH01000043G0210
	PH01000043G0280
	PH01000043G0370
	PH01000043G0380
	PH01000043G0500
	PH01000043G0510
	PH01000043G0550
	PH01000043G0870
	PH01000043G1290
	PH01000043G1330
	PH01000043G1440
	PH01000043G1650
	PH01000043G1720
	PH01000043G1740
	PH01000043G1840
	PH01000043G1850
	PH01000043G1890
	PH01000043G1970
	PH01000043G2090
	PH01000043G2130
	PH01000043G2150
	PH01000044G0060
	PH01000044G0090
	PH01000044G0140
	PH01000044G0160
	PH01000044G0230
	PH01000044G0320
	PH01000044G0420
	PH01000044G0460
	PH01000044G0510
	PH01000044G0590
	PH01000044G0660
	PH01000044G0720
	PH01000044G0910
	PH01000044G1040
	PH01000044G1190
	PH01000044G1200
	PH01000044G1340
	PH01000044G1380
	PH01000044G1410
	PH01000044G1470
	PH01000044G1520
	PH01000044G1560
	PH01000044G1710
	PH01000044G1760
	PH01000044G1810
	PH01000044G1890
	PH01000044G1910
	PH01000044G1960
	PH01000044G1970
	PH01000044G2050
	PH01000044G2060
	PH01000045G0040
	PH01000045G0150
	PH01000045G0160
	PH01000045G0170
	PH01000045G0240
	PH01000045G0270
	PH01000045G0410
	PH01000045G0900
	PH01000045G0990
	PH01000045G1190
	PH01000045G1200
	PH01000045G1220
	PH01000045G1230
	PH01000045G1240
	PH01000045G1260
	PH01000045G1330
	PH01000045G1340
	PH01000045G1370
	PH01000045G1430
	PH01000045G1480
	PH01000045G1520
	PH01000045G1540
	PH01000045G1550
	PH01000045G1570
	PH01000045G1600
	PH01000045G1690
	PH01000045G2140
	PH01000046G0010
	PH01000046G0020
	PH01000046G0060
	PH01000046G0140
	PH01000046G0170
	PH01000046G0220
	PH01000046G0310
	PH01000046G0360
	PH01000046G0380
	PH01000046G0520
	PH01000046G0590
	PH01000046G0600
	PH01000046G0650
	PH01000046G0660
	PH01000046G0800
	PH01000046G0840
	PH01000046G0910
	PH01000046G0920
	PH01000046G0930
	PH01000046G0970
	PH01000046G0980
	PH01000046G0990
	PH01000046G1030
	PH01000046G1090
	PH01000046G1180
	PH01000046G1190
	PH01000046G1380
	PH01000046G1390
	PH01000046G1530
	PH01000046G1550
	PH01000046G1660
	PH01000046G1730
	PH01000046G1830
	PH01000046G2060
	PH01000047G0010
	PH01000047G0030
	PH01000047G0130
	PH01000047G0140
	PH01000047G0210
	PH01000047G0250
	PH01000047G0260
	PH01000047G0350
	PH01000047G0400
	PH01000047G0420
	PH01000047G0560
	PH01000047G0730
	PH01000047G0750
	PH01000047G0840
	PH01000047G1040
	PH01000047G1060
	PH01000047G1080
	PH01000047G1180
	PH01000047G1190
	PH01000047G1410
	PH01000047G1520
	PH01000047G1660
	PH01000047G1750
	PH01000047G1790
	PH01000047G2000
	PH01000047G2010
	PH01000048G0100
	PH01000048G0110
	PH01000048G0270
	PH01000048G0330
	PH01000048G0400
	PH01000048G0430
	PH01000048G0570
	PH01000048G0630
	PH01000048G0640
	PH01000048G0660
	PH01000048G0690
	PH01000048G0750
	PH01000048G0790
	PH01000048G0850
	PH01000048G0920
	PH01000048G1000
	PH01000048G1190
	PH01000048G1310
	PH01000048G1360
	PH01000048G1370
	PH01000048G1600
	PH01000048G1770
	PH01000048G2090
	PH01000049G0050
	PH01000049G0080
	PH01000049G0150
	PH01000049G0160
	PH01000049G0180
	PH01000049G0190
	PH01000049G0260
	PH01000049G0280
	PH01000049G0320
	PH01000049G0480
	PH01000049G0580
	PH01000049G0590
	PH01000049G0720
	PH01000049G1070
	PH01000049G1110
	PH01000049G1120
	PH01000049G1170
	PH01000049G1380
	PH01000049G1410
	PH01000049G1420
	PH01000049G1450
	PH01000049G1510
	PH01000049G1650
	PH01000049G1700
	PH01000049G1940
	PH01000049G2050
	PH01000049G2290
	PH01000049G2360
	PH01000050G0250
	PH01000050G0440
	PH01000050G0500
	PH01000050G0740
	PH01000050G0820
	PH01000050G0900
	PH01000050G0970
	PH01000050G1080
	PH01000050G1090
	PH01000050G1100
	PH01000050G1140
	PH01000050G1200
	PH01000050G1280
	PH01000050G1350
	PH01000050G1490
	PH01000050G1510
	PH01000050G2090
	PH01000051G0230
	PH01000051G0520
	PH01000051G1080
	PH01000051G1290
	PH01000051G1610
	PH01000051G1620
	PH01000051G1670
	PH01000051G1860
	PH01000051G1910
	PH01000052G0200
	PH01000052G0290
	PH01000052G0540
	PH01000052G0690
	PH01000052G0880
	PH01000052G0950
	PH01000052G1030
	PH01000052G1300
	PH01000052G1500
	PH01000052G1660
	PH01000052G1870
	PH01000053G0400
	PH01000053G0500
	PH01000053G0650
	PH01000053G0820
	PH01000053G1060
	PH01000053G1080
	PH01000053G1100
	PH01000053G1120
	PH01000053G1230
	PH01000053G1250
	PH01000053G1520
	PH01000053G1530
	PH01000053G1590
	PH01000053G1610
	PH01000053G1650
	PH01000053G2090
	PH01000053G2220
	PH01000053G2340
	PH01000054G0290
	PH01000054G0310
	PH01000054G0400
	PH01000054G0470
	PH01000054G0580
	PH01000054G0800
	PH01000054G0860
	PH01000054G0960
	PH01000054G1090
	PH01000054G1380
	PH01000054G1500
	PH01000054G1610
	PH01000054G1690
	PH01000054G1720
	PH01000054G1820
	PH01000054G1900
	PH01000054G2010
	PH01000054G2100
	PH01000054G2270
	PH01000054G2280
	PH01000054G2410
	PH01000055G0740
	PH01000055G0860
	PH01000055G0870
	PH01000055G0980
	PH01000055G0990
	PH01000055G1160
	PH01000055G1190
	PH01000055G1270
	PH01000055G1400
	PH01000055G1540
	PH01000055G1680
	PH01000055G1690
	PH01000055G1750
	PH01000055G1960
	PH01000055G2000
	PH01000055G2020
	PH01000055G2030
	PH01000055G2040
	PH01000055G2050
	PH01000056G0170
	PH01000056G0180
	PH01000056G0250
	PH01000056G0270
	PH01000056G0340
	PH01000056G0370
	PH01000056G0380
	PH01000056G0420
	PH01000056G0430
	PH01000056G0440
	PH01000056G0470
	PH01000056G0490
	PH01000056G0500
	PH01000056G0510
	PH01000056G0580
	PH01000056G0630
	PH01000056G0640
	PH01000056G0780
	PH01000056G0810
	PH01000056G0850
	PH01000056G0980
	PH01000056G1110
	PH01000056G1180
	PH01000056G1200
	PH01000056G1370
	PH01000056G1500
	PH01000056G1510
	PH01000056G1520
	PH01000056G1530
	PH01000056G1560
	PH01000056G1570
	PH01000056G1590
	PH01000056G1680
	PH01000056G1770
	PH01000056G1870
	PH01000056G1900
	PH01000057G0110
	PH01000057G0120
	PH01000057G0130
	PH01000057G0180
	PH01000057G0190
	PH01000057G0240
	PH01000057G0430
	PH01000057G0450
	PH01000057G0560
	PH01000057G0630
	PH01000057G0670
	PH01000057G0810
	PH01000057G0840
	PH01000057G1050
	PH01000057G1110
	PH01000057G1170
	PH01000057G1220
	PH01000057G1250
	PH01000057G1260
	PH01000057G1540
	PH01000057G1550
	PH01000057G1570
	PH01000057G1610
	PH01000057G1650
	PH01000057G1660
	PH01000057G1720
	PH01000057G1930
	PH01000057G1950
	PH01000057G1990
	PH01000057G2030
	PH01000057G2050
	PH01000058G0270
	PH01000058G0390
	PH01000058G0460
	PH01000058G0470
	PH01000058G0780
	PH01000058G0950
	PH01000058G0990
	PH01000058G1000
	PH01000058G1180
	PH01000058G1330
	PH01000058G1380
	PH01000058G1390
	PH01000058G1580
	PH01000058G1590
	PH01000058G1620
	PH01000058G1640
	PH01000058G1660
	PH01000058G1810
	PH01000058G1870
	PH01000058G1900
	PH01000058G2000
	PH01000058G2170
	PH01000058G2220
	PH01000058G2230
	PH01000059G0130
	PH01000059G0210
	PH01000059G0350
	PH01000059G0380
	PH01000059G0480
	PH01000059G0560
	PH01000059G0730
	PH01000059G0810
	PH01000059G1030
	PH01000059G1190
	PH01000059G1270
	PH01000059G1540
	PH01000059G1620
	PH01000059G1690
	PH01000059G1700
	PH01000059G1720
	PH01000059G1740
	PH01000059G1940
	PH01000059G2060
	PH01000059G2100
	PH01000059G2110
	PH01000060G0050
	PH01000060G0310
	PH01000060G0420
	PH01000060G0430
	PH01000060G0450
	PH01000060G0530
	PH01000060G0610
	PH01000060G0730
	PH01000060G0800
	PH01000060G1060
	PH01000060G1180
	PH01000060G1580
	PH01000060G1600
	PH01000060G1710
	PH01000060G1760
	PH01000060G1850
	PH01000060G1880
	PH01000061G0080
	PH01000061G0090
	PH01000061G0100
	PH01000061G0410
	PH01000061G0450
	PH01000061G0540
	PH01000061G0550
	PH01000061G0590
	PH01000061G0600
	PH01000061G0670
	PH01000061G0690
	PH01000061G0730
	PH01000061G0800
	PH01000061G0850
	PH01000061G0870
	PH01000061G0920
	PH01000061G0930
	PH01000061G0950
	PH01000061G1050
	PH01000061G1230
	PH01000061G1320
	PH01000061G1340
	PH01000061G1790
	PH01000061G1920
	PH01000062G0100
	PH01000062G0110
	PH01000062G0130
	PH01000062G0230
	PH01000062G0240
	PH01000062G0310
	PH01000062G0580
	PH01000062G0590
	PH01000062G0610
	PH01000062G0620
	PH01000062G0700
	PH01000062G0750
	PH01000062G0920
	PH01000062G1130
	PH01000062G1200
	PH01000062G1350
	PH01000062G1400
	PH01000062G1410
	PH01000062G1420
	PH01000062G1430
	PH01000062G1450
	PH01000062G1480
	PH01000062G1530
	PH01000062G1630
	PH01000062G1700
	PH01000062G1710
	PH01000062G1950
	PH01000062G1960
	PH01000062G1990
	PH01000063G0130
	PH01000063G0140
	PH01000063G0180
	PH01000063G0330
	PH01000063G0560
	PH01000063G0570
	PH01000063G0580
	PH01000063G0650
	PH01000063G1020
	PH01000063G1250
	PH01000063G1300
	PH01000063G1430
	PH01000063G1450
	PH01000063G1480
	PH01000063G1550
	PH01000063G1610
	PH01000063G1650
	PH01000063G1660
	PH01000063G1800
	PH01000063G1850
	PH01000063G1880
	PH01000063G1910
	PH01000063G1940
	PH01000063G1950
	PH01000063G1970
	PH01000064G0020
	PH01000064G0140
	PH01000064G0530
	PH01000064G0570
	PH01000064G0590
	PH01000064G0630
	PH01000064G0750
	PH01000064G0890
	PH01000064G0940
	PH01000064G0990
	PH01000064G1170
	PH01000064G1200
	PH01000064G1230
	PH01000064G1240
	PH01000064G1280
	PH01000064G1300
	PH01000064G1360
	PH01000064G1520
	PH01000064G1560
	PH01000064G1570
	PH01000064G1590
	PH01000064G1600
	PH01000064G1730
	PH01000064G1830
	PH01000064G1870
	PH01000064G1900
	PH01000064G1930
	PH01000064G1990
	PH01000064G2010
	PH01000064G2020
	PH01000064G2060
	PH01000064G2200
	PH01000065G0080
	PH01000065G0180
	PH01000065G0260
	PH01000065G0300
	PH01000065G0330
	PH01000065G0400
	PH01000065G0660
	PH01000065G0670
	PH01000065G0880
	PH01000065G1130
	PH01000065G1160
	PH01000065G1370
	PH01000065G1380
	PH01000065G1460
	PH01000065G1650
	PH01000065G1710
	PH01000065G1770
	PH01000065G1800
	PH01000065G2150
	PH01000065G2160
	PH01000065G2210
	PH01000066G0090
	PH01000066G0340
	PH01000066G0460
	PH01000066G0520
	PH01000066G0530
	PH01000066G0580
	PH01000066G0660
	PH01000066G0890
	PH01000066G0960
	PH01000066G1040
	PH01000066G1200
	PH01000066G1230
	PH01000066G1270
	PH01000066G1320
	PH01000066G1340
	PH01000066G1410
	PH01000066G1500
	PH01000066G1540
	PH01000066G1880
	PH01000066G1950
	PH01000067G0030
	PH01000067G0070
	PH01000067G0320
	PH01000067G0340
	PH01000067G0360
	PH01000067G0410
	PH01000067G1370
	PH01000067G1430
	PH01000067G1510
	PH01000067G1530
	PH01000067G1590
	PH01000068G0020
	PH01000068G0070
	PH01000068G0080
	PH01000068G0120
	PH01000068G0130
	PH01000068G0150
	PH01000068G0190
	PH01000068G0230
	PH01000068G0320
	PH01000068G0390
	PH01000068G0430
	PH01000068G0540
	PH01000068G0620
	PH01000068G0630
	PH01000068G0660
	PH01000068G0710
	PH01000068G0720
	PH01000068G0760
	PH01000068G0780
	PH01000068G0840
	PH01000068G0870
	PH01000068G0880
	PH01000068G0890
	PH01000068G0900
	PH01000068G0910
	PH01000068G1050
	PH01000068G1080
	PH01000068G1130
	PH01000068G1210
	PH01000068G1240
	PH01000068G1270
	PH01000068G1280
	PH01000068G1300
	PH01000068G1310
	PH01000068G1320
	PH01000068G1330
	PH01000068G1340
	PH01000068G1380
	PH01000068G1390
	PH01000068G1400
	PH01000068G1470
	PH01000068G1510
	PH01000068G1610
	PH01000068G1650
	PH01000068G1660
	PH01000068G1680
	PH01000068G1690
	PH01000068G1710
	PH01000068G1750
	PH01000068G1790
	PH01000068G1860
	PH01000068G1870
	PH01000068G1890
	PH01000069G0010
	PH01000069G0340
	PH01000069G0540
	PH01000069G0560
	PH01000069G0630
	PH01000069G0690
	PH01000069G0750
[truncated: 17,060 more rows]

## Sheet: "8H" and "0.5H"
	781 common elements in "8H" and "0.5H":
	PH01000000G0290
	PH01000000G0330
	PH01000000G5690
	PH01000001G0500
	PH01000001G3290
	PH01000002G0160
	PH01000002G1660
	PH01000002G2800
	PH01000002G2840
	PH01000002G3900
	PH01000003G2480
	PH01000004G0570
	PH01000005G0300
	PH01000005G1190
	PH01000005G1260
	PH01000006G1450
	PH01000007G0830
	PH01000010G1220
	PH01000010G1850
	PH01000010G2050
	PH01000010G3140
	PH01000012G1020
	PH01000013G2460
	PH01000014G0540
	PH01000015G0160
	PH01000015G0230
	PH01000016G0280
	PH01000016G1360
	PH01000017G0150
	PH01000018G0380
	PH01000018G0790
	PH01000018G1920
	PH01000019G0030
	PH01000019G0360
	PH01000020G0110
	PH01000020G1910
	PH01000020G2200
	PH01000021G0190
	PH01000021G1500
	PH01000022G1700
	PH01000022G2350
	PH01000024G0900
	PH01000024G2200
	PH01000026G1120
	PH01000026G2140
	PH01000029G1680
	PH01000031G2220
	PH01000032G0710
	PH01000032G1240
	PH01000032G1420
	PH01000032G1860
	PH01000033G1420
	PH01000033G1560
	PH01000038G0030
	PH01000038G1850
	PH01000039G0780
	PH01000040G0160
	PH01000040G0510
	PH01000042G0030
	PH01000042G2200
	PH01000043G1410
	PH01000045G0230
	PH01000045G0630
	PH01000045G0970
	PH01000046G0290
	PH01000046G1670
	PH01000047G0100
	PH01000047G0740
	PH01000047G0860
	PH01000048G1100
	PH01000049G2330
	PH01000050G0890
	PH01000050G1020
	PH01000050G1790
	PH01000051G0480
	PH01000051G1770
	PH01000052G0250
	PH01000054G1230
	PH01000054G1270
	PH01000054G1710
	PH01000056G1910
	PH01000057G0800
	PH01000057G1690
	PH01000058G1140
	PH01000058G1310
	PH01000058G1990
	PH01000059G1120
	PH01000059G2190
	PH01000062G0470
	PH01000062G1110
	PH01000064G2100
	PH01000065G0050
	PH01000066G0500
	PH01000066G0670
	PH01000067G1560
	PH01000068G1020
	PH01000068G1090
	PH01000068G1620
	PH01000068G1920
	PH01000069G0060
	PH01000070G1160
	PH01000071G0210
	PH01000074G0770
	PH01000076G1580
	PH01000080G0890
	PH01000080G1350
	PH01000081G1590
	PH01000083G0040
	PH01000084G0750
	PH01000085G1170
	PH01000087G1530
	PH01000090G1460
	PH01000090G1630
	PH01000096G0890
	PH01000098G0620
	PH01000104G1340
	PH01000109G1160
	PH01000111G0760
	PH01000112G0310
	PH01000112G0630
	PH01000112G0640
	PH01000114G0030
	PH01000115G0530
	PH01000115G1360
	PH01000118G0750
	PH01000118G1400
	PH01000119G0710
	PH01000119G0780
	PH01000120G0370
	PH01000125G1100
	PH01000126G0800
	PH01000129G0360
	PH01000130G1040
	PH01000131G1390
	PH01000133G0280
	PH01000135G0260
	PH01000139G0420
	PH01000139G0690
	PH01000139G0750
	PH01000139G1200
	PH01000141G0030
	PH01000141G0190
	PH01000141G0870
	PH01000145G0260
	PH01000145G0860
	PH01000145G1540
	PH01000148G1100
	PH01000154G0440
	PH01000154G1240
	PH01000158G1040
	PH01000161G0040
	PH01000164G0950
	PH01000166G0130
	PH01000169G1000
	PH01000171G0560
	PH01000172G0740
	PH01000173G0210
	PH01000173G0500
	PH01000173G1130
	PH01000176G1140
	PH01000178G0530
	PH01000185G0320
	PH01000191G0730
	PH01000191G0820
	PH01000192G1410
	PH01000193G1280
	PH01000196G0330
	PH01000198G0670
	PH01000203G0610
	PH01000206G0370
	PH01000206G1300
	PH01000207G0390
	PH01000207G1210
	PH01000212G1030
	PH01000223G0280
	PH01000223G1130
	PH01000227G0360
	PH01000227G1420
	PH01000228G1280
	PH01000231G0250
	PH01000242G1390
	PH01000251G0960
	PH01000254G0180
	PH01000254G0570
	PH01000254G0920
	PH01000258G0190
	PH01000261G0890
	PH01000266G0360
	PH01000267G0890
	PH01000271G0580
	PH01000271G0690
	PH01000278G0590
	PH01000279G0080
	PH01000280G1220
	PH01000281G0780
	PH01000284G0720
	PH01000286G0070
	PH01000286G0290
	PH01000290G0470
	PH01000292G0580
	PH01000293G1240
	PH01000297G0230
	PH01000300G0050
	PH01000300G0520
	PH01000300G0810
	PH01000302G0810
	PH01000303G0240
	PH01000306G1110
	PH01000312G0740
	PH01000312G1160
	PH01000318G1020
	PH01000319G0220
	PH01000324G0500
	PH01000328G0280
	PH01000340G1000
	PH01000343G0430
	PH01000345G0560
	PH01000346G0510
	PH01000352G0730
	PH01000355G0340
	PH01000357G0540
	PH01000359G0900
	PH01000362G1060
	PH01000369G1000
	PH01000373G0800
	PH01000376G0970
	PH01000377G0450
	PH01000378G0770
	PH01000379G0160
	PH01000380G0450
	PH01000380G0470
	PH01000385G0640
	PH01000392G0730
	PH01000395G0680
	PH01000401G0730
	PH01000402G0410
	PH01000405G0700
	PH01000406G0320
	PH01000411G0180
	PH01000411G0840
	PH01000412G0320
	PH01000413G0240
	PH01000414G0580
	PH01000417G0610
	PH01000418G0010
	PH01000418G0050
	PH01000418G0440
	PH01000418G0720
	PH01000429G0720
	PH01000430G0320
	PH01000432G0750
	PH01000433G0320
	PH01000435G0420
	PH01000435G0670
	PH01000436G0090
	PH01000436G0710
	PH01000437G0180
	PH01000437G0570
	PH01000439G0310
	PH01000444G0710
	PH01000447G0740
	PH01000448G0200
	PH01000448G0220
	PH01000448G0710
	PH01000453G0220
	PH01000456G0850
	PH01000460G0190
	PH01000464G0920
	PH01000465G0080
	PH01000465G0660
	PH01000466G0960
	PH01000468G0770
	PH01000472G0860
	PH01000474G0470
	PH01000474G0760
	PH01000474G0780
	PH01000475G0470
	PH01000478G0680
	PH01000478G1050
	PH01000482G0700
	PH01000486G0360
	PH01000490G0100
	PH01000490G0250
	PH01000496G0070
	PH01000500G0520
	PH01000502G0180
	PH01000507G0250
	PH01000511G0190
	PH01000511G0420
	PH01000513G0030
	PH01000513G0300
	PH01000513G0530
	PH01000513G0590
	PH01000513G0600
	PH01000526G0770
	PH01000529G0510
	PH01000530G0580
	PH01000538G0250
	PH01000538G0300
	PH01000545G0540
	PH01000546G0620
	PH01000548G0100
	PH01000548G0440
	PH01000548G0690
	PH01000549G0400
	PH01000552G0250
	PH01000552G0510
	PH01000555G0170
	PH01000560G0030
	PH01000560G0630
	PH01000560G0740
	PH01000569G0550
	PH01000578G0550
	PH01000586G0180
	PH01000589G0780
	PH01000593G0220
	PH01000595G0790
	PH01000603G0820
	PH01000612G0240
	PH01000612G0250
	PH01000617G0820
	PH01000622G0670
	PH01000623G0320
	PH01000625G0460
	PH01000627G0150
	PH01000632G0450
	PH01000634G0760
	PH01000641G0240
	PH01000643G0050
	PH01000644G0700
	PH01000654G0330
	PH01000666G0220
	PH01000668G0390
	PH01000670G0570
	PH01000680G0460
	PH01000683G0620
	PH01000685G0640
	PH01000688G0030
	PH01000695G0190
	PH01000696G0060
	PH01000698G0590
	PH01000700G0300
	PH01000702G0670
	PH01000705G0620
	PH01000707G0500
	PH01000708G0120
	PH01000711G0510
	PH01000711G0690
	PH01000712G0640
	PH01000720G0530
	PH01000728G0010
	PH01000731G0480
	PH01000742G0470
	PH01000754G0620
	PH01000764G0680
	PH01000773G0580
	PH01000776G0230
	PH01000776G0280
	PH01000781G0160
	PH01000794G0080
	PH01000795G0520
	PH01000797G0440
	PH01000801G0400
	PH01000808G0080
	PH01000809G0010
	PH01000813G0030
	PH01000820G0170
	PH01000836G0660
	PH01000837G0330
	PH01000839G0020
	PH01000845G0110
	PH01000854G0620
	PH01000868G0460
	PH01000873G0130
	PH01000880G0230
	PH01000891G0620
	PH01000896G0290
	PH01000905G0290
	PH01000909G0340
	PH01000921G0130
	PH01000921G0270
	PH01000932G0250
	PH01000943G0050
	PH01000943G0260
	PH01000943G0340
	PH01000949G0590
	PH01000950G0020
	PH01000952G0340
	PH01000957G0300
	PH01000958G0140
	PH01000961G0310
	PH01000965G0280
	PH01000965G0370
	PH01000967G0180
	PH01000971G0370
	PH01000999G0610
	PH01001008G0510
	PH01001010G0200
	PH01001025G0430
	PH01001029G0140
	PH01001030G0640
	PH01001038G0420
	PH01001042G0390
	PH01001042G0410
	PH01001042G0430
	PH01001057G0170
	PH01001065G0460
	PH01001074G0560
	PH01001102G0260
	PH01001102G0300
	PH01001105G0500
	PH01001107G0500
	PH01001109G0470
	PH01001113G0650
	PH01001115G0500
	PH01001115G0600
	PH01001120G0010
	PH01001127G0210
	PH01001128G0680
	PH01001135G0280
	PH01001148G0600
	PH01001153G0180
	PH01001163G0450
	PH01001170G0310
	PH01001170G0470
	PH01001173G0410
	PH01001173G0590
	PH01001175G0060
	PH01001178G0340
	PH01001195G0280
	PH01001202G0120
	PH01001206G0170
	PH01001208G0080
	PH01001214G0380
	PH01001215G0400
	PH01001221G0080
	PH01001227G0390
	PH01001233G0460
	PH01001239G0650
	PH01001246G0150
	PH01001255G0270
	PH01001258G0260
	PH01001268G0520
	PH01001281G0390
	PH01001284G0090
	PH01001285G0430
	PH01001289G0260
	PH01001294G0220
	PH01001299G0140
	PH01001317G0210
	PH01001318G0180
	PH01001327G0170
	PH01001328G0190
	PH01001328G0200
	PH01001328G0610
	PH01001348G0440
	PH01001360G0530
	PH01001363G0270
	PH01001378G0460
	PH01001382G0040
	PH01001390G0430
	PH01001392G0010
	PH01001393G0210
	PH01001393G0410
	PH01001405G0370
	PH01001406G0380
	PH01001410G0220
	PH01001417G0310
	PH01001428G0090
	PH01001438G0190
	PH01001448G0160
	PH01001451G0380
	PH01001459G0050
	PH01001465G0360
	PH01001474G0150
	PH01001478G0020
	PH01001480G0410
	PH01001489G0110
	PH01001492G0340
	PH01001496G0450
	PH01001502G0200
	PH01001506G0290
	PH01001515G0160
	PH01001528G0310
	PH01001556G0180
	PH01001556G0440
	PH01001572G0270
	PH01001580G0080
	PH01001587G0080
	PH01001587G0260
	PH01001601G0220
	PH01001609G0330
	PH01001613G0150
	PH01001632G0110
	PH01001639G0310
	PH01001641G0420
	PH01001659G0260
	PH01001669G0130
	PH01001670G0010
	PH01001671G0340
	PH01001675G0360
	PH01001684G0040
	PH01001733G0350
	PH01001736G0240
	PH01001737G0070
	PH01001743G0130
	PH01001744G0020
	PH01001760G0220
	PH01001767G0080
	PH01001769G0230
	PH01001775G0220
	PH01001775G0330
	PH01001778G0330
	PH01001791G0490
	PH01001808G0330
	PH01001812G0090
	PH01001834G0170
	PH01001842G0180
	PH01001843G0210
	PH01001843G0290
	PH01001852G0020
	PH01001853G0280
	PH01001858G0100
	PH01001858G0120
	PH01001868G0360
	PH01001881G0230
	PH01001894G0350
	PH01001897G0130
	PH01001918G0040
	PH01001922G0100
	PH01001934G0130
	PH01001934G0260
	PH01001936G0100
	PH01001937G0180
	PH01001937G0190
	PH01001940G0210
	PH01001942G0260
	PH01001953G0220
	PH01001957G0020
	PH01001961G0320
	PH01001967G0180
	PH01001968G0130
	PH01001971G0300
	PH01001972G0090
	PH01001973G0150
	PH01001981G0220
	PH01001982G0340
	PH01001982G0390
	PH01001983G0020
	PH01001992G0060
	PH01001995G0140
	PH01001996G0040
	PH01002029G0050
	PH01002033G0270
	PH01002050G0140
	PH01002053G0060
	PH01002080G0420
	PH01002102G0120
	PH01002107G0010
	PH01002111G0060
	PH01002127G0330
	PH01002131G0150
	PH01002133G0230
	PH01002136G0270
	PH01002182G0120
	PH01002182G0230
	PH01002187G0270
	PH01002203G0260
	PH01002217G0270
	PH01002223G0140
	PH01002223G0190
	PH01002245G0100
	PH01002258G0420
	PH01002273G0270
	PH01002284G0240
	PH01002314G0120
	PH01002328G0120
	PH01002335G0340
	PH01002342G0270
	PH01002344G0210
	PH01002348G0040
	PH01002348G0070
	PH01002421G0040
	PH01002421G0060
	PH01002424G0260
	PH01002426G0040
	PH01002435G0250
	PH01002448G0020
	PH01002470G0120
	PH01002470G0220
	PH01002495G0280
	PH01002496G0100
	PH01002507G0180
	PH01002517G0190
	PH01002522G0090
	PH01002529G0070
	PH01002541G0030
	PH01002541G0040
	PH01002561G0270
	PH01002568G0130
	PH01002568G0190
	PH01002606G0040
	PH01002616G0140
	PH01002618G0040
	PH01002623G0160
	PH01002623G0170
	PH01002624G0240
	PH01002633G0070
	PH01002646G0090
	PH01002648G0170
	PH01002648G0300
	PH01002656G0180
	PH01002662G0020
	PH01002722G0070
	PH01002733G0270
	PH01002743G0190
	PH01002773G0210
	PH01002791G0090
	PH01002792G0120
	PH01002793G0180
	PH01002804G0180
	PH01002809G0030
	PH01002823G0110
	PH01002828G0210
	PH01002892G0270
	PH01002909G0090
	PH01002916G0060
	PH01002938G0080
	PH01002950G0300
	PH01002959G0140
	PH01002960G0110
	PH01002963G0080
	PH01002968G0060
	PH01003011G0210
	PH01003022G0140
	PH01003030G0230
	PH01003040G0250
	PH01003042G0090
	PH01003056G0060
	PH01003064G0180
	PH01003100G0090
	PH01003110G0050
	PH01003118G0090
	PH01003141G0220
	PH01003145G0170
	PH01003145G0180
	PH01003169G0110
	PH01003181G0090
	PH01003184G0060
	PH01003358G0130
	PH01003363G0020
	PH01003363G0150
	PH01003384G0150
	PH01003391G0180
	PH01003393G0080
	PH01003394G0190
	PH01003398G0020
	PH01003428G0130
	PH01003433G0010
	PH01003433G0030
	PH01003464G0060
	PH01003464G0150
	PH01003471G0090
	PH01003471G0100
	PH01003475G0120
	PH01003475G0200
	PH01003541G0100
	PH01003567G0150
	PH01003575G0120
	PH01003579G0080
	PH01003605G0020
	PH01003615G0130
	PH01003619G0120
	PH01003621G0090
	PH01003621G0130
	PH01003628G0160
	PH01003634G0100
	PH01003649G0010
	PH01003663G0210
	PH01003704G0230
	PH01003710G0120
	PH01003758G0210
	PH01003778G0100
	PH01003790G0150
	PH01003804G0120
	PH01003810G0070
	PH01003819G0090
	PH01003853G0030
	PH01003894G0090
	PH01003898G0190
	PH01003910G0030
	PH01003918G0100
	PH01003929G0130
	PH01003974G0030
	PH01004036G0040
	PH01004058G0090
	PH01004058G0180
	PH01004078G0110
	PH01004084G0080
	PH01004098G0130
	PH01004191G0010
	PH01004209G0110
	PH01004292G0050
	PH01004297G0100
	PH01004308G0010
	PH01004403G0060
	PH01004446G0090
	PH01004457G0100
	PH01004461G0140
	PH01004480G0110
	PH01004480G0140
	PH01004495G0130
	PH01004551G0080
	PH01004566G0080
	PH01004591G0010
	PH01004676G0020
	PH01004720G0080
	PH01004733G0080
	PH01004821G0090
	PH01004835G0050
	PH01004923G0090
	PH01004931G0020
	PH01004933G0090
	PH01004966G0100
	PH01004979G0080
	PH01004986G0080
	PH01005129G0100
	PH01005142G0050
	PH01005199G0080
	PH01005255G0070
	PH01005377G0030
	PH01005385G0130
	PH01005423G0030
	PH01005572G0060
	PH01005628G0020
	PH01005653G0040
	PH01005755G0060
	PH01005966G0040
	PH01005974G0060
	PH01005981G0060
	PH01006014G0040
	PH01006038G0010
	PH01006119G0050
	PH01006252G0010
	PH01006260G0050
	PH01006264G0050
	PH01006473G0020
	PH01006519G0030
	PH01006699G0010
	PH01006889G0020
	PH01009982G0010
	PH01012908G0010
	PH01015374G0010
	PH01021243G0010
	PH01022187G0010
	PH01022927G0010
	PH01034546G0010
	PH01038932G0010
	PH01046013G0010
	PH01049243G0010
	PH01067693G0010
	PH01069730G0010
	PH01070898G0010
	PH01079803G0010
	PH01081003G0010
	PH01086314G0010
	PH01087750G0010
	PH01095084G0010
	PH01126932G0010
	PH01134634G0010
	PH01155675G0010
	PH01160152G0010
	PH01162164G0010
	PH01163881G0010
	PH01175427G0010
	PH01187294G0010
	PH01193926G0010
	PH01195697G0010
	PH01224762G0010
	PH01275409G0010
	PH01277107G0010

## Sheet:  "0.5H" and "CK"
	588 common elements in "0.5H" and "CK":
	PH01000000G3890
	PH01000001G1870
	PH01000003G4220
	PH01000004G1630
	PH01000004G3370
	PH01000006G0660
	PH01000007G2970
	PH01000008G1020
	PH01000008G1030
	PH01000008G2640
	PH01000009G2460
	PH01000009G2960
	PH01000011G0660
	PH01000012G1110
	PH01000016G0630
	PH01000018G2290
	PH01000019G0920
	PH01000019G2250
	PH01000019G2380
	PH01000020G2590
	PH01000024G1020
	PH01000025G1630
	PH01000025G1710
	PH01000026G0420
	PH01000027G0630
	PH01000027G1860
	PH01000027G1910
	PH01000028G1110
	PH01000029G1150
	PH01000029G2180
	PH01000031G0250
	PH01000031G0260
	PH01000031G0520
	PH01000032G0100
	PH01000032G1250
	PH01000034G1010
	PH01000034G1060
	PH01000036G0680
	PH01000036G0710
	PH01000037G1260
	PH01000041G1410
	PH01000042G0850
	PH01000042G1950
	PH01000044G0380
	PH01000045G0050
	PH01000046G1680
	PH01000047G0760
	PH01000047G1100
	PH01000047G1210
	PH01000048G0350
	PH01000055G1030
	PH01000058G1600
	PH01000060G1670
	PH01000061G0490
	PH01000063G0370
	PH01000063G1210
	PH01000064G1860
	PH01000066G0020
	PH01000066G0750
	PH01000068G0740
	PH01000072G0910
	PH01000073G0920
	PH01000073G1050
	PH01000077G0340
	PH01000080G0600
	PH01000081G0960
	PH01000083G0620
	PH01000085G1330
	PH01000086G1520
	PH01000087G1160
	PH01000090G0080
	PH01000090G0620
	PH01000090G1640
	PH01000095G1490
	PH01000097G0760
	PH01000097G0820
	PH01000105G0510
	PH01000105G0830
	PH01000105G1660
	PH01000106G1090
	PH01000109G1480
	PH01000110G0110
	PH01000112G1290
	PH01000115G0420
	PH01000118G0450
	PH01000119G0260
	PH01000127G1300
	PH01000129G0840
	PH01000129G0990
	PH01000129G1000
	PH01000130G0310
	PH01000131G1260
	PH01000135G0150
	PH01000137G0030
	PH01000142G0620
	PH01000143G0730
	PH01000143G1400
	PH01000144G1390
	PH01000145G0070
	PH01000145G1150
	PH01000146G0350
	PH01000146G1150
	PH01000149G0040
	PH01000156G0830
	PH01000160G0780
	PH01000164G0530
	PH01000165G0210
	PH01000169G0770
	PH01000173G0590
	PH01000176G0670
	PH01000180G0300
	PH01000181G1040
	PH01000183G0940
	PH01000183G1130
	PH01000183G1350
	PH01000186G0330
	PH01000200G0790
	PH01000202G0040
	PH01000204G0280
	PH01000207G0780
	PH01000216G0600
	PH01000217G0030
	PH01000217G0050
	PH01000218G1080
	PH01000220G0710
	PH01000220G1120
	PH01000224G1130
	PH01000225G0310
	PH01000229G1200
	PH01000232G0140
	PH01000233G0480
	PH01000234G1320
	PH01000243G0870
	PH01000252G1040
	PH01000253G0720
	PH01000258G0670
	PH01000259G0240
	PH01000261G0290
	PH01000261G0540
	PH01000262G1390
	PH01000265G0120
	PH01000270G0760
	PH01000272G0790
	PH01000280G0430
	PH01000280G0440
	PH01000280G0830
	PH01000284G0960
	PH01000299G0150
	PH01000300G0250
	PH01000303G0970
	PH01000309G0360
	PH01000316G0940
	PH01000340G1150
	PH01000346G0220
	PH01000346G0240
	PH01000346G0830
	PH01000348G0920
	PH01000351G0650
	PH01000355G0600
	PH01000355G0640
	PH01000356G0560
	PH01000356G1140
	PH01000360G0500
	PH01000361G0620
	PH01000365G0270
	PH01000370G0060
	PH01000376G0520
	PH01000376G0870
	PH01000381G0910
	PH01000384G0870
	PH01000391G0410
	PH01000392G0830
	PH01000397G0740
	PH01000407G0880
	PH01000413G0760
	PH01000413G1010
	PH01000414G0120
	PH01000417G0920
	PH01000418G0700
	PH01000430G0350
	PH01000431G0760
	PH01000433G0870
	PH01000434G0060
	PH01000443G0160
	PH01000444G0720
	PH01000449G0860
	PH01000450G0480
	PH01000451G0070
	PH01000452G0310
	PH01000453G0440
	PH01000458G0690
	PH01000463G0650
	PH01000464G0390
	PH01000468G0190
	PH01000468G0410
	PH01000473G0550
	PH01000474G0510
	PH01000487G0060
	PH01000498G0170
	PH01000498G0790
	PH01000500G0090
	PH01000503G0950
	PH01000526G0380
	PH01000528G0980
	PH01000543G0550
	PH01000543G0880
	PH01000545G0390
	PH01000545G0990
	PH01000549G0480
	PH01000556G0320
	PH01000563G0540
	PH01000568G0640
	PH01000570G0010
	PH01000592G0420
	PH01000600G0490
	PH01000604G0580
	PH01000613G0520
	PH01000617G0100
	PH01000623G0280
	PH01000625G0630
	PH01000628G0330
	PH01000628G0480
	PH01000638G0040
	PH01000638G0680
	PH01000639G0140
	PH01000640G0190
	PH01000640G0270
	PH01000642G0230
	PH01000646G0090
	PH01000648G0210
	PH01000648G0550
	PH01000658G0350
	PH01000659G0190
	PH01000661G0770
	PH01000665G0620
	PH01000669G0030
	PH01000670G0310
	PH01000685G0020
	PH01000688G0120
	PH01000705G0380
	PH01000718G0490
	PH01000718G0500
	PH01000740G0320
	PH01000751G0710
	PH01000758G0280
	PH01000758G0430
	PH01000773G0140
	PH01000776G0590
	PH01000780G0520
	PH01000780G0730
	PH01000783G0350
	PH01000787G0760
	PH01000788G0220
	PH01000804G0320
	PH01000811G0090
	PH01000815G0690
	PH01000829G0190
	PH01000829G0650
	PH01000831G0490
	PH01000846G0730
	PH01000850G0310
	PH01000862G0470
	PH01000869G0510
	PH01000871G0370
	PH01000875G0180
	PH01000875G0300
	PH01000891G0720
	PH01000898G0600
	PH01000900G0290
	PH01000905G0570
	PH01000911G0310
	PH01000919G0360
	PH01000920G0290
	PH01000924G0630
	PH01000925G0590
	PH01000931G0400
	PH01000942G0280
	PH01000944G0170
	PH01000947G0610
	PH01000949G0050
	PH01000954G0470
	PH01000961G0430
	PH01000968G0140
	PH01000974G0450
	PH01000975G0130
	PH01000977G0140
	PH01000998G0010
	PH01001007G0060
	PH01001008G0250
	PH01001019G0410
	PH01001020G0120
	PH01001020G0530
	PH01001035G0550
	PH01001036G0590
	PH01001037G0060
	PH01001052G0650
	PH01001053G0150
	PH01001054G0640
	PH01001064G0640
	PH01001067G0090
	PH01001067G0170
	PH01001070G0330
	PH01001075G0520
	PH01001088G0220
	PH01001090G0060
	PH01001093G0240
	PH01001094G0550
	PH01001118G0470
	PH01001139G0250
	PH01001141G0550
	PH01001155G0360
	PH01001157G0380
	PH01001158G0570
	PH01001167G0450
	PH01001168G0090
	PH01001170G0300
	PH01001171G0010
	PH01001173G0190
	PH01001181G0100
	PH01001184G0390
	PH01001193G0160
	PH01001208G0400
	PH01001210G0270
	PH01001216G0110
	PH01001217G0220
	PH01001217G0370
	PH01001217G0390
	PH01001220G0640
	PH01001229G0220
	PH01001234G0480
	PH01001235G0160
	PH01001247G0270
	PH01001247G0380
	PH01001247G0490
	PH01001268G0180
	PH01001271G0280
	PH01001273G0410
	PH01001279G0150
	PH01001279G0300
	PH01001280G0510
	PH01001281G0440
	PH01001294G0070
	PH01001295G0430
	PH01001297G0010
	PH01001307G0260
	PH01001315G0270
	PH01001325G0480
	PH01001328G0500
	PH01001337G0470
	PH01001339G0170
	PH01001341G0290
	PH01001353G0120
	PH01001353G0250
	PH01001365G0060
	PH01001365G0550
	PH01001367G0280
	PH01001378G0360
	PH01001382G0370
	PH01001391G0200
	PH01001398G0110
	PH01001404G0410
	PH01001405G0430
	PH01001421G0320
	PH01001425G0470
	PH01001430G0250
	PH01001464G0070
	PH01001465G0160
	PH01001475G0170
	PH01001481G0410
	PH01001492G0440
	PH01001494G0060
	PH01001496G0370
	PH01001499G0460
	PH01001500G0110
	PH01001506G0160
	PH01001506G0200
	PH01001506G0360
	PH01001515G0010
	PH01001519G0230
	PH01001531G0320
	PH01001533G0340
	PH01001536G0280
	PH01001557G0130
	PH01001559G0180
	PH01001576G0060
	PH01001579G0330
	PH01001585G0430
	PH01001588G0270
	PH01001593G0510
	PH01001600G0280
	PH01001604G0010
	PH01001614G0080
	PH01001624G0290
	PH01001626G0100
	PH01001639G0230
	PH01001641G0020
	PH01001655G0240
	PH01001659G0050
	PH01001673G0060
	PH01001676G0030
	PH01001698G0040
	PH01001709G0250
	PH01001711G0340
	PH01001728G0060
	PH01001731G0300
	PH01001737G0100
	PH01001739G0240
	PH01001740G0240
	PH01001745G0160
	PH01001745G0260
	PH01001748G0140
	PH01001756G0240
	PH01001761G0250
	PH01001770G0010
	PH01001777G0410
	PH01001790G0060
	PH01001797G0360
	PH01001798G0080
	PH01001801G0360
	PH01001826G0250
	PH01001857G0080
	PH01001880G0240
	PH01001881G0080
	PH01001892G0330
	PH01001899G0220
	PH01001899G0250
	PH01001902G0270
	PH01001918G0380
	PH01001926G0080
	PH01001935G0150
	PH01001952G0190
	PH01001964G0160
	PH01001972G0170
	PH01001977G0150
	PH01001979G0300
	PH01001996G0350
	PH01002020G0410
	PH01002038G0040
	PH01002038G0050
	PH01002049G0250
	PH01002053G0300
	PH01002082G0090
	PH01002087G0050
	PH01002097G0110
	PH01002188G0240
	PH01002190G0080
	PH01002248G0320
	PH01002249G0120
	PH01002255G0300
	PH01002258G0470
	PH01002279G0200
	PH01002304G0120
	PH01002304G0180
	PH01002305G0300
	PH01002315G0120
	PH01002343G0250
	PH01002346G0200
	PH01002369G0270
	PH01002391G0110
	PH01002404G0070
	PH01002434G0030
	PH01002436G0170
	PH01002444G0060
	PH01002448G0300
	PH01002461G0050
	PH01002501G0330
	PH01002518G0170
	PH01002518G0180
	PH01002520G0130
	PH01002521G0070
	PH01002523G0140
	PH01002571G0210
	PH01002578G0190
	PH01002594G0170
	PH01002604G0150
	PH01002625G0120
	PH01002636G0210
	PH01002653G0150
	PH01002741G0130
	PH01002743G0130
	PH01002743G0180
	PH01002789G0170
	PH01002796G0150
	PH01002796G0200
	PH01002820G0030
	PH01002852G0110
	PH01002852G0120
	PH01002861G0010
	PH01002869G0180
	PH01002885G0010
	PH01002899G0210
	PH01002927G0090
	PH01002938G0150
	PH01002938G0200
	PH01002975G0270
	PH01002976G0020
	PH01002997G0170
	PH01002998G0320
	PH01003022G0040
	PH01003033G0180
	PH01003048G0070
	PH01003048G0090
	PH01003093G0240
	PH01003111G0210
	PH01003113G0060
	PH01003115G0080
	PH01003131G0110
	PH01003138G0210
	PH01003158G0040
	PH01003195G0140
	PH01003232G0130
	PH01003280G0180
	PH01003320G0160
	PH01003411G0110
	PH01003446G0050
	PH01003475G0140
	PH01003493G0130
	PH01003510G0150
	PH01003520G0150
	PH01003551G0010
	PH01003572G0090
	PH01003579G0140
	PH01003592G0080
	PH01003618G0070
	PH01003619G0010
	PH01003670G0140
	PH01003720G0110
	PH01003807G0150
	PH01003840G0160
	PH01003857G0060
	PH01003871G0090
	PH01003973G0030
	PH01003977G0150
	PH01004014G0080
	PH01004061G0140
	PH01004062G0010
	PH01004165G0090
	PH01004198G0020
	PH01004205G0110
	PH01004294G0160
	PH01004299G0140
	PH01004307G0040
	PH01004423G0090
	PH01004435G0130
	PH01004450G0140
	PH01004456G0010
	PH01004590G0050
	PH01004706G0090
	PH01004782G0020
	PH01004883G0100
	PH01004902G0030
	PH01004973G0080
	PH01005144G0040
	PH01005347G0090
	PH01005514G0020
	PH01005562G0100
	PH01005591G0010
	PH01005895G0010
	PH01005912G0020
	PH01005914G0030
	PH01006232G0040
	PH01006391G0030
	PH01006466G0050
	PH01006594G0070
	PH01006683G0010
	PH01006812G0030
	PH01007320G0040
	PH01007498G0040
	PH01007505G0020
	PH01008427G0020
	PH01009244G0010
	PH01011415G0030
	PH01012051G0010
	PH01013513G0010
	PH01014517G0010
	PH01026494G0010
	PH01042696G0010
	PH01049548G0010
	PH01062850G0010
	PH01079997G0010
	PH01154970G0010
	PH01160453G0010
	PH01161871G0010
	PH01163840G0010
	PH01228083G0010
	PH01248306G0010
	PH01250549G0010
	PH01260002G0010

## Sheet: "8H" and "CK"
	373 common elements in "8H" and "CK":
	PH01000000G2240
	PH01000001G1880
	PH01000003G2770
	PH01000003G3800
	PH01000004G4460
	PH01000005G0050
	PH01000005G1500
	PH01000005G1850
	PH01000005G2880
	PH01000006G0960
	PH01000008G0200
	PH01000009G1660
	PH01000012G0950
	PH01000013G1110
	PH01000015G1440
	PH01000018G0970
	PH01000018G1460
	PH01000019G0630
	PH01000019G1900
	PH01000019G2390
	PH01000026G1880
	PH01000027G2330
	PH01000030G1800
	PH01000035G1650
	PH01000036G1460
	PH01000038G1480
	PH01000040G1430
	PH01000041G0380
	PH01000042G0290
	PH01000049G0910
	PH01000052G1320
	PH01000054G0640
	PH01000055G0710
	PH01000056G1470
	PH01000060G0090
	PH01000060G0460
	PH01000063G0270
	PH01000066G1670
	PH01000067G0380
	PH01000067G1350
	PH01000067G1770
	PH01000069G1480
	PH01000073G0310
	PH01000073G0710
	PH01000080G0750
	PH01000080G0770
	PH01000081G0470
	PH01000084G0620
	PH01000087G0560
	PH01000093G0170
	PH01000093G0190
	PH01000096G1810
	PH01000109G0220
	PH01000110G0680
	PH01000117G0420
	PH01000119G0500
	PH01000123G0910
	PH01000134G0880
	PH01000139G0410
	PH01000152G0320
	PH01000152G0760
	PH01000153G0740
	PH01000154G1070
	PH01000156G0810
	PH01000156G0930
	PH01000157G0980
	PH01000161G1110
	PH01000174G0150
	PH01000182G0670
	PH01000187G0940
	PH01000187G0970
	PH01000195G0140
	PH01000195G1090
	PH01000209G0330
	PH01000209G1290
	PH01000210G0060
	PH01000223G1150
	PH01000224G0700
	PH01000224G0880
	PH01000224G0980
	PH01000224G1170
	PH01000233G0070
	PH01000244G0430
	PH01000246G0180
	PH01000257G0700
	PH01000259G0090
	PH01000266G0830
	PH01000267G0590
	PH01000272G0890
	PH01000273G0040
	PH01000274G1160
	PH01000276G1120
	PH01000282G0020
	PH01000289G0870
	PH01000293G0320
	PH01000312G1170
	PH01000333G0630
	PH01000342G1030
	PH01000357G1060
	PH01000375G0320
	PH01000377G0370
	PH01000383G0010
	PH01000383G0600
	PH01000399G0080
	PH01000402G0860
	PH01000404G0440
	PH01000405G0010
	PH01000407G0040
	PH01000426G1010
	PH01000428G0740
	PH01000449G0940
	PH01000451G0320
	PH01000460G0560
	PH01000464G0410
	PH01000474G0100
	PH01000477G0600
	PH01000484G0400
	PH01000491G0110
	PH01000497G0760
	PH01000504G0460
	PH01000507G1040
	PH01000511G0620
	PH01000521G0130
	PH01000523G0410
	PH01000525G0560
	PH01000530G0310
	PH01000530G0830
	PH01000534G0160
	PH01000541G0630
	PH01000545G0760
	PH01000558G0430
	PH01000567G0470
	PH01000567G0630
	PH01000577G0140
	PH01000585G0110
	PH01000588G0340
	PH01000598G0790
	PH01000601G0200
	PH01000602G0790
	PH01000607G0130
	PH01000609G0750
	PH01000611G0460
	PH01000616G0010
	PH01000619G0530
	PH01000622G0730
	PH01000624G0580
	PH01000630G0070
	PH01000640G0720
	PH01000640G0730
	PH01000644G0440
	PH01000698G0140
	PH01000710G0360
	PH01000713G0250
	PH01000716G0680
	PH01000717G0030
	PH01000718G0320
	PH01000732G0380
	PH01000743G0100
	PH01000755G0060
	PH01000756G0110
	PH01000766G0130
	PH01000778G0020
	PH01000784G0620
	PH01000792G0660
	PH01000794G0680
	PH01000798G0710
	PH01000799G0640
	PH01000809G0320
	PH01000812G0260
	PH01000818G0620
	PH01000825G0440
	PH01000838G0140
	PH01000878G0400
	PH01000880G0580
	PH01000886G0260
	PH01000890G0430
	PH01000892G0080
	PH01000893G0530
	PH01000901G0230
	PH01000901G0610
	PH01000912G0160
	PH01000939G0360
	PH01000961G0500
	PH01000979G0500
	PH01000982G0350
	PH01000990G0270
	PH01001026G0340
	PH01001033G0080
	PH01001034G0440
	PH01001053G0050
	PH01001059G0270
	PH01001063G0380
	PH01001068G0580
	PH01001070G0640
	PH01001080G0050
	PH01001108G0330
	PH01001117G0180
	PH01001141G0170
	PH01001141G0400
	PH01001142G0060
	PH01001142G0220
	PH01001151G0610
	PH01001158G0650
	PH01001170G0330
	PH01001173G0260
	PH01001214G0390
	PH01001252G0110
	PH01001259G0270
	PH01001266G0230
	PH01001281G0090
	PH01001292G0070
	PH01001320G0360
	PH01001336G0150
	PH01001339G0280
	PH01001355G0400
	PH01001365G0540
	PH01001371G0060
	PH01001412G0130
	PH01001415G0110
	PH01001431G0130
	PH01001431G0390
	PH01001432G0420
	PH01001446G0260
	PH01001453G0210
	PH01001460G0110
	PH01001463G0090
	PH01001491G0200
	PH01001500G0090
	PH01001505G0310
	PH01001510G0110
	PH01001513G0070
	PH01001532G0200
	PH01001540G0200
	PH01001575G0120
	PH01001589G0340
	PH01001599G0050
	PH01001607G0170
	PH01001613G0300
	PH01001638G0260
	PH01001678G0280
	PH01001688G0260
	PH01001714G0220
	PH01001737G0460
	PH01001739G0180
	PH01001747G0400
	PH01001761G0190
	PH01001779G0420
	PH01001790G0140
	PH01001790G0150
	PH01001795G0370
	PH01001806G0150
	PH01001834G0140
	PH01001844G0350
	PH01001847G0210
	PH01001857G0310
	PH01001881G0390
	PH01001891G0480
	PH01001898G0240
	PH01001905G0200
	PH01001918G0350
	PH01001976G0030
	PH01002001G0140
	PH01002017G0030
	PH01002024G0310
	PH01002084G0140
	PH01002087G0060
	PH01002103G0230
	PH01002181G0040
	PH01002187G0040
	PH01002204G0260
	PH01002213G0360
	PH01002296G0240
	PH01002312G0120
	PH01002329G0300
	PH01002350G0170
	PH01002405G0160
	PH01002411G0380
	PH01002425G0300
	PH01002443G0130
	PH01002488G0080
	PH01002516G0230
	PH01002540G0230
	PH01002560G0290
	PH01002570G0270
	PH01002573G0110
	PH01002584G0300
	PH01002609G0150
	PH01002639G0160
	PH01002680G0080
	PH01002694G0160
	PH01002743G0050
	PH01002747G0220
	PH01002755G0020
	PH01002755G0080
	PH01002775G0190
	PH01002776G0100
	PH01002782G0030
	PH01002825G0140
	PH01002847G0260
	PH01002885G0230
	PH01002905G0010
	PH01002921G0190
	PH01002998G0230
	PH01003010G0170
	PH01003016G0230
	PH01003017G0040
	PH01003108G0030
	PH01003318G0040
	PH01003366G0170
	PH01003384G0160
	PH01003453G0190
	PH01003460G0040
	PH01003478G0160
	PH01003496G0220
	PH01003571G0050
	PH01003585G0190
	PH01003657G0210
	PH01003670G0040
	PH01003720G0060
	PH01003837G0070
	PH01003849G0010
	PH01003906G0040
	PH01003997G0030
	PH01004007G0120
	PH01004078G0140
	PH01004123G0020
	PH01004123G0100
	PH01004295G0010
	PH01004397G0090
	PH01004428G0110
	PH01004469G0020
	PH01004563G0110
	PH01004743G0100
	PH01004749G0080
	PH01004819G0030
	PH01004875G0100
	PH01004884G0060
	PH01004887G0090
	PH01005072G0040
	PH01005250G0020
	PH01005391G0020
	PH01005440G0040
	PH01005973G0040
	PH01006039G0080
	PH01006274G0070
	PH01006594G0020
	PH01006808G0040
	PH01006808G0070
	PH01007469G0020
	PH01010585G0010
	PH01013457G0010
	PH01018617G0010
	PH01018750G0010
	PH01019743G0010
	PH01032556G0010
	PH01034140G0010
	PH01035391G0010
	PH01047850G0010
	PH01081832G0010
	PH01082848G0010
	PH01089942G0010
	PH01092931G0010
	PH01143404G0010
	PH01148782G0010
	PH01148787G0010
	PH01155911G0010
	PH01157007G0010
	PH01162728G0010
	PH01163051G0010
	PH01179664G0010
	PH01215887G0010
	PH01220829G0010
	PH01257556G0010

## Sheet: CK
	414 elements included exclusively in "CK":
	PH01000000G4410
	PH01000000G5200
	PH01000001G4800
	PH01000002G0790
	PH01000002G1040
	PH01000002G3270
	PH01000003G3600
	PH01000004G2220
	PH01000005G1530
	PH01000006G1010
	PH01000009G0270
	PH01000009G0850
	PH01000009G1680
	PH01000010G0620
	PH01000010G2810
	PH01000011G2580
	PH01000012G0190
	PH01000012G1750
	PH01000017G0920
	PH01000018G0940
	PH01000018G2330
	PH01000019G1660
	PH01000020G1430
	PH01000021G0040
	PH01000023G1030
	PH01000023G1810
	PH01000024G1960
	PH01000025G1990
	PH01000028G2600
	PH01000029G0280
	PH01000031G1000
	PH01000033G0120
	PH01000035G0560
	PH01000038G0050
	PH01000041G1980
	PH01000042G0700
	PH01000047G0020
	PH01000048G0370
	PH01000048G0670
	PH01000050G0170
	PH01000050G1460
	PH01000051G1650
	PH01000054G1390
	PH01000055G0480
	PH01000056G0400
	PH01000058G1290
	PH01000058G2050
	PH01000062G2000
	PH01000064G1250
	PH01000068G0670
	PH01000070G0530
	PH01000070G1010
	PH01000070G2140
	PH01000081G0040
	PH01000081G0810
	PH01000083G0250
	PH01000083G0900
	PH01000083G1220
	PH01000086G1230
	PH01000087G0210
	PH01000087G1340
	PH01000093G0950
	PH01000095G0440
	PH01000096G0170
	PH01000099G1100
	PH01000100G0060
	PH01000104G1120
	PH01000109G0100
	PH01000111G0660
	PH01000116G0070
	PH01000116G1160
	PH01000117G0310
	PH01000117G0710
	PH01000119G0070
	PH01000133G1190
	PH01000145G0340
	PH01000145G0510
	PH01000154G1380
	PH01000158G0940
	PH01000158G1230
	PH01000161G0070
	PH01000164G0630
	PH01000166G1030
	PH01000166G1330
	PH01000167G0500
	PH01000171G1250
	PH01000173G0660
	PH01000191G0680
	PH01000192G1350
	PH01000197G0410
	PH01000202G0810
	PH01000203G0790
	PH01000208G0890
	PH01000214G0560
	PH01000247G1150
	PH01000257G0040
	PH01000260G0890
	PH01000262G0060
	PH01000262G0150
	PH01000262G0280
	PH01000271G0680
	PH01000271G0830
	PH01000272G0710
	PH01000276G1190
	PH01000278G0620
	PH01000283G0810
	PH01000287G1210
	PH01000292G0840
	PH01000295G0040
	PH01000299G0330
	PH01000303G0160
	PH01000317G0170
	PH01000317G0730
	PH01000321G0150
	PH01000323G0670
	PH01000327G0190
	PH01000337G0250
	PH01000343G0340
	PH01000344G0180
	PH01000349G0420
	PH01000353G0580
	PH01000357G0990
	PH01000360G0820
	PH01000364G0520
	PH01000367G0970
	PH01000368G0970
	PH01000377G0250
	PH01000381G0900
	PH01000387G0450
	PH01000397G0930
	PH01000407G0730
	PH01000415G0740
	PH01000423G0840
	PH01000429G0400
	PH01000429G1070
	PH01000437G0630
	PH01000443G0450
	PH01000458G0200
	PH01000461G0430
	PH01000461G0540
	PH01000463G1100
	PH01000466G0450
	PH01000466G0490
	PH01000481G0470
	PH01000489G0110
	PH01000490G0040
	PH01000490G0470
	PH01000490G1060
	PH01000490G1100
	PH01000492G0220
	PH01000492G0240
	PH01000493G0660
	PH01000496G0330
	PH01000497G0700
	PH01000505G0360
	PH01000515G0660
	PH01000517G0640
	PH01000523G0440
	PH01000542G0140
	PH01000542G0390
	PH01000545G0710
	PH01000557G0040
	PH01000558G0230
	PH01000565G0230
	PH01000566G0510
	PH01000582G0560
	PH01000583G0260
	PH01000583G0620
	PH01000595G0290
	PH01000605G0560
	PH01000609G0250
	PH01000618G1010
	PH01000621G0910
	PH01000627G0560
	PH01000630G0510
	PH01000632G0530
	PH01000641G0750
	PH01000649G0690
	PH01000657G0360
	PH01000661G0840
	PH01000663G0370
	PH01000663G0530
	PH01000665G0740
	PH01000666G0890
	PH01000667G0040
	PH01000667G0600
	PH01000679G0310
	PH01000687G0900
	PH01000691G0410
	PH01000700G0430
	PH01000712G0680
	PH01000715G0380
	PH01000723G0460
	PH01000724G0610
	PH01000724G0700
	PH01000742G0090
	PH01000745G0150
	PH01000750G0610
	PH01000770G0470
	PH01000783G0750
	PH01000784G0820
	PH01000788G0210
	PH01000789G0750
	PH01000797G0340
	PH01000806G0130
	PH01000817G0310
	PH01000838G0370
	PH01000847G0680
	PH01000855G0230
	PH01000861G0640
	PH01000886G0310
	PH01000888G0040
	PH01000889G0100
	PH01000892G0030
	PH01000901G0580
	PH01000914G0070
	PH01000926G0410
	PH01000928G0100
	PH01000929G0560
	PH01000930G0020
	PH01000931G0030
	PH01000942G0270
	PH01000952G0380
	PH01000956G0140
	PH01000963G0310
	PH01000975G0350
	PH01000983G0020
	PH01000992G0430
	PH01001011G0470
	PH01001012G0510
	PH01001035G0240
	PH01001046G0030
	PH01001048G0540
	PH01001064G0370
	PH01001075G0140
	PH01001112G0510
	PH01001129G0100
	PH01001141G0430
	PH01001166G0230
	PH01001174G0160
	PH01001174G0480
	PH01001184G0320
	PH01001197G0220
	PH01001207G0140
	PH01001227G0320
	PH01001237G0110
	PH01001240G0120
	PH01001243G0350
	PH01001252G0290
	PH01001259G0220
	PH01001262G0260
	PH01001283G0470
	PH01001286G0190
	PH01001300G0520
	PH01001329G0010
	PH01001332G0240
	PH01001347G0390
	PH01001432G0330
	PH01001458G0130
	PH01001474G0010
	PH01001522G0140
	PH01001523G0550
	PH01001545G0250
	PH01001562G0090
	PH01001569G0140
	PH01001596G0130
	PH01001608G0070
	PH01001621G0360
	PH01001640G0010
	PH01001657G0180
	PH01001690G0310
	PH01001722G0290
	PH01001725G0150
	PH01001787G0180
	PH01001798G0090
	PH01001800G0280
	PH01001801G0430
	PH01001810G0160
	PH01001828G0040
	PH01001837G0240
	PH01001844G0410
	PH01001845G0220
	PH01001850G0350
	PH01001852G0360
	PH01001871G0210
	PH01001872G0190
	PH01001892G0300
	PH01001907G0370
	PH01001910G0100
	PH01001915G0220
	PH01001920G0150
	PH01001985G0220
	PH01001986G0360
	PH01001994G0120
	PH01002001G0150
	PH01002010G0160
	PH01002017G0310
	PH01002019G0190
	PH01002025G0060
	PH01002047G0280
	PH01002092G0430
	PH01002099G0080
	PH01002132G0200
	PH01002161G0050
	PH01002203G0040
	PH01002235G0160
	PH01002274G0070
	PH01002280G0320
	PH01002291G0280
	PH01002294G0260
	PH01002296G0040
	PH01002316G0320
	PH01002367G0010
	PH01002382G0250
	PH01002396G0010
	PH01002405G0310
	PH01002451G0260
	PH01002499G0240
	PH01002503G0090
	PH01002519G0090
	PH01002532G0110
	PH01002534G0170
	PH01002557G0090
	PH01002562G0030
	PH01002570G0300
	PH01002621G0020
	PH01002645G0220
	PH01002654G0270
	PH01002753G0070
	PH01002792G0260
	PH01002820G0170
	PH01002846G0040
	PH01002849G0250
	PH01002855G0100
	PH01002864G0100
	PH01002864G0110
	PH01002887G0240
	PH01002905G0220
	PH01002909G0060
	PH01002968G0170
	PH01002980G0030
	PH01002988G0090
	PH01003019G0120
	PH01003045G0040
	PH01003064G0210
	PH01003092G0300
	PH01003113G0160
	PH01003126G0080
	PH01003146G0030
	PH01003154G0100
	PH01003181G0080
	PH01003184G0120
	PH01003189G0120
	PH01003194G0160
	PH01003231G0010
	PH01003240G0050
	PH01003282G0230
	PH01003299G0090
	PH01003431G0170
	PH01003451G0240
	PH01003523G0030
	PH01003566G0160
	PH01003597G0240
	PH01003662G0200
	PH01003736G0010
	PH01003750G0120
	PH01003762G0140
	PH01003839G0040
	PH01003871G0080
	PH01003959G0060
	PH01004013G0090
	PH01004025G0080
	PH01004066G0100
	PH01004076G0030
	PH01004129G0090
	PH01004172G0070
	PH01004177G0020
	PH01004280G0150
	PH01004348G0070
	PH01004432G0110
	PH01004511G0040
	PH01004826G0040
	PH01004956G0070
	PH01005014G0090
	PH01005167G0080
	PH01005172G0110
	PH01005226G0080
	PH01005386G0020
	PH01005449G0020
	PH01005515G0070
	PH01005566G0040
	PH01005626G0040
	PH01005758G0020
	PH01005853G0060
	PH01005959G0040
	PH01006213G0050
	PH01006330G0060
	PH01006710G0030
	PH01007000G0010
	PH01007086G0020
	PH01007419G0040
	PH01007546G0020
	PH01008001G0030
	PH01008425G0020
	PH01008885G0020
	PH01014534G0010
	PH01052843G0010
	PH01077351G0010
	PH01082816G0010
	PH01098731G0010
	PH01161603G0010
	PH01168019G0010
	PH01252211G0010
	PH01264382G0010

## Sheet: 8H
	716 elements included exclusively in "8H":
	PH01000000G0920
	PH01000000G4350
	PH01000000G4400
	PH01000000G6090
	PH01000001G0670
	PH01000001G3120
	PH01000002G4280
	PH01000003G1880
	PH01000004G0500
	PH01000004G1430
	PH01000004G3220
	PH01000006G0400
	PH01000006G1230
	PH01000006G2800
	PH01000007G3390
	PH01000009G0320
	PH01000009G2490
	PH01000010G0110
	PH01000010G1960
	PH01000010G2510
	PH01000012G1010
	PH01000012G2900
	PH01000013G0270
	PH01000013G0290
	PH01000013G1010
	PH01000013G1310
	PH01000014G1850
	PH01000017G1550
	PH01000018G0360
	PH01000019G1370
	PH01000019G2150
	PH01000020G0260
	PH01000020G0340
	PH01000020G1170
	PH01000022G1000
	PH01000023G0380
	PH01000027G0250
	PH01000030G0070
	PH01000030G0670
	PH01000032G0330
	PH01000032G0810
	PH01000032G0820
	PH01000035G2060
	PH01000036G1890
	PH01000037G1240
	PH01000040G0890
	PH01000044G2040
	PH01000045G0480
	PH01000045G0490
	PH01000045G0710
	PH01000047G2030
	PH01000049G0750
	PH01000050G1230
	PH01000055G0610
	PH01000055G1330
	PH01000055G1360
	PH01000056G0890
	PH01000057G1310
	PH01000057G1760
	PH01000058G1750
	PH01000059G0180
	PH01000061G1290
	PH01000064G0640
	PH01000064G1120
	PH01000068G0170
	PH01000068G0180
	PH01000068G1550
	PH01000069G1060
	PH01000069G1660
	PH01000071G1510
	PH01000075G0580
	PH01000077G1100
	PH01000077G1630
	PH01000079G0450
	PH01000082G0370
	PH01000082G1810
	PH01000084G1400
	PH01000084G1810
	PH01000084G1870
	PH01000088G0190
	PH01000091G0990
	PH01000092G0430
	PH01000092G1460
	PH01000092G1480
	PH01000093G1700
	PH01000094G1610
	PH01000106G0440
	PH01000106G0670
	PH01000106G1230
	PH01000108G0790
	PH01000109G0890
	PH01000111G1300
	PH01000112G0530
	PH01000113G1040
	PH01000118G1620
	PH01000120G0360
	PH01000122G0280
	PH01000133G1390
	PH01000136G0020
	PH01000136G0200
	PH01000141G0970
	PH01000142G0600
	PH01000142G1570
	PH01000150G0020
	PH01000150G0260
	PH01000154G0330
	PH01000155G0840
	PH01000159G1000
	PH01000160G0990
	PH01000161G0560
	PH01000161G1070
	PH01000162G1160
	PH01000166G0430
	PH01000168G0780
	PH01000170G1110
	PH01000171G0040
	PH01000172G0450
	PH01000177G0090
	PH01000178G0310
	PH01000179G0920
	PH01000180G1240
	PH01000181G0670
	PH01000183G0790
	PH01000186G1150
	PH01000190G1150
	PH01000193G0030
	PH01000197G0160
	PH01000201G0980
	PH01000202G0750
	PH01000203G1030
	PH01000214G0180
	PH01000215G0230
	PH01000221G1090
	PH01000223G0040
	PH01000223G0830
	PH01000225G0700
	PH01000225G1390
	PH01000229G0090
	PH01000230G0190
	PH01000231G0020
	PH01000235G0790
	PH01000240G0060
	PH01000242G0340
	PH01000242G0690
	PH01000243G0860
	PH01000244G1210
	PH01000245G0160
	PH01000246G0100
	PH01000248G0640
	PH01000252G0950
	PH01000253G1030
	PH01000257G0590
	PH01000259G0460
	PH01000259G0740
	PH01000265G0490
	PH01000266G0140
	PH01000267G0630
	PH01000268G0100
	PH01000268G0120
	PH01000268G0540
	PH01000273G0940
	PH01000275G0610
	PH01000277G0630
	PH01000277G0990
	PH01000284G0630
	PH01000286G0770
	PH01000288G0820
	PH01000289G0460
	PH01000291G0940
	PH01000306G1200
	PH01000308G0100
	PH01000308G0710
	PH01000308G1010
	PH01000311G1390
	PH01000312G0500
	PH01000313G0190
	PH01000313G0970
	PH01000315G0250
	PH01000319G0300
	PH01000322G0140
	PH01000322G0310
	PH01000324G0490
	PH01000335G1110
	PH01000338G0020
	PH01000340G0700
	PH01000343G0880
	PH01000345G0580
	PH01000347G1310
	PH01000349G0370
	PH01000349G0450
	PH01000355G0040
	PH01000355G1080
	PH01000356G1050
	PH01000356G1060
	PH01000357G0170
	PH01000361G0870
	PH01000367G0180
	PH01000367G1080
	PH01000370G0930
	PH01000371G0360
	PH01000371G0580
	PH01000376G0170
	PH01000378G0230
	PH01000378G0930
	PH01000381G0050
	PH01000382G0960
	PH01000383G0630
	PH01000384G0810
	PH01000385G0450
	PH01000386G0660
	PH01000392G0980
	PH01000395G0560
	PH01000401G0650
	PH01000402G0210
	PH01000404G0290
	PH01000404G0960
	PH01000408G0180
	PH01000409G0970
	PH01000410G0260
	PH01000421G0300
	PH01000424G1020
	PH01000426G0560
	PH01000429G0160
	PH01000430G0880
	PH01000431G0060
	PH01000432G0060
	PH01000433G0700
	PH01000433G0980
	PH01000436G0350
	PH01000436G0450
	PH01000438G0160
	PH01000441G0190
	PH01000441G0520
	PH01000444G0900
	PH01000451G0900
	PH01000455G0160
	PH01000459G0010
	PH01000461G0230
	PH01000463G0070
	PH01000463G0140
	PH01000464G0090
	PH01000464G0470
	PH01000465G0480
	PH01000466G0980
	PH01000471G0210
	PH01000476G0130
	PH01000477G0160
	PH01000480G0670
	PH01000484G0740
	PH01000491G0390
	PH01000493G0950
	PH01000497G0750
	PH01000502G0350
	PH01000505G0440
	PH01000507G0180
	PH01000508G0290
	PH01000509G0640
	PH01000509G0860
	PH01000511G0020
	PH01000513G0510
	PH01000515G0330
	PH01000516G0110
	PH01000516G0330
	PH01000517G0590
	PH01000517G0790
	PH01000520G0140
	PH01000530G0860
	PH01000531G0210
	PH01000536G0060
	PH01000537G0710
	PH01000543G0410
	PH01000543G0780
	PH01000546G1020
	PH01000551G0790
	PH01000565G0360
	PH01000568G0660
	PH01000569G0040
	PH01000570G0290
	PH01000572G0690
	PH01000573G0760
	PH01000578G0030
	PH01000590G0070
	PH01000591G0710
	PH01000594G0630
	PH01000595G0350
	PH01000600G0580
	PH01000603G0510
	PH01000603G0940
	PH01000606G0080
	PH01000610G0250
	PH01000610G0280
	PH01000634G0180
	PH01000636G0320
	PH01000637G0020
	PH01000638G0140
	PH01000642G0520
	PH01000652G0580
	PH01000652G0600
	PH01000654G0460
	PH01000659G0570
	PH01000662G0460
	PH01000662G0550
	PH01000666G0830
	PH01000668G0350
	PH01000669G0720
	PH01000670G0130
	PH01000675G0030
	PH01000675G0120
	PH01000686G0090
	PH01000691G0630
	PH01000694G0750
	PH01000694G0760
	PH01000696G0600
	PH01000701G0320
	PH01000701G0560
	PH01000701G0750
	PH01000705G0760
	PH01000707G0710
	PH01000707G0950
	PH01000716G0580
	PH01000717G0180
	PH01000723G0640
	PH01000739G0170
	PH01000739G0680
	PH01000742G0510
	PH01000743G0080
	PH01000743G0280
	PH01000749G0570
	PH01000751G0390
	PH01000756G0430
	PH01000764G0360
	PH01000767G0040
	PH01000775G0170
	PH01000776G0090
	PH01000781G0390
	PH01000791G0220
	PH01000794G0690
	PH01000802G0150
	PH01000804G0170
	PH01000812G0550
	PH01000818G0430
	PH01000818G0740
	PH01000821G0260
	PH01000825G0330
	PH01000840G0550
	PH01000843G0060
	PH01000850G0260
	PH01000861G0140
	PH01000862G0600
	PH01000872G0560
	PH01000872G0570
	PH01000873G0140
	PH01000876G0250
	PH01000885G0070
	PH01000890G0760
	PH01000893G0520
	PH01000897G0070
	PH01000904G0450
	PH01000905G0170
	PH01000908G0460
	PH01000910G0100
	PH01000910G0170
	PH01000917G0270
	PH01000917G0280
	PH01000920G0540
	PH01000925G0100
	PH01000925G0250
	PH01000926G0320
	PH01000928G0560
	PH01000932G0270
	PH01000940G0070
	PH01000949G0560
	PH01000954G0280
	PH01000956G0430
	PH01000958G0460
	PH01000970G0100
	PH01000971G0250
	PH01000974G0330
	PH01000975G0170
	PH01000978G0420
	PH01000980G0520
	PH01000984G0530
	PH01000985G0340
	PH01000995G0050
	PH01000996G0070
	PH01001003G0370
	PH01001006G0010
	PH01001018G0340
	PH01001022G0490
	PH01001026G0200
	PH01001042G0210
	PH01001042G0490
	PH01001054G0220
	PH01001057G0590
	PH01001058G0220
	PH01001063G0030
	PH01001065G0060
	PH01001066G0300
	PH01001067G0200
	PH01001072G0140
	PH01001096G0090
	PH01001096G0520
	PH01001105G0370
	PH01001109G0630
	PH01001111G0180
	PH01001115G0590
	PH01001128G0140
	PH01001131G0380
	PH01001149G0380
	PH01001153G0210
	PH01001157G0020
	PH01001158G0410
	PH01001170G0420
	PH01001170G0630
	PH01001176G0340
	PH01001181G0310
	PH01001182G0460
	PH01001184G0410
	PH01001191G0010
	PH01001195G0510
	PH01001196G0370
	PH01001203G0400
	PH01001206G0610
	PH01001226G0090
	PH01001228G0500
	PH01001251G0240
	PH01001251G0540
	PH01001266G0620
	PH01001267G0150
	PH01001274G0440
	PH01001281G0230
	PH01001291G0390
	PH01001306G0070
	PH01001306G0080
	PH01001317G0230
	PH01001320G0030
	PH01001343G0210
	PH01001344G0180
	PH01001359G0190
	PH01001370G0510
	PH01001371G0200
	PH01001371G0430
	PH01001379G0400
	PH01001382G0070
	PH01001382G0100
	PH01001384G0430
	PH01001384G0490
	PH01001387G0440
	PH01001390G0020
	PH01001395G0410
	PH01001398G0360
	PH01001409G0360
	PH01001410G0210
	PH01001416G0280
	PH01001424G0230
	PH01001428G0330
	PH01001431G0110
	PH01001441G0180
	PH01001446G0280
	PH01001453G0020
	PH01001470G0150
	PH01001470G0360
	PH01001473G0050
	PH01001481G0400
	PH01001514G0190
	PH01001536G0220
	PH01001548G0400
	PH01001551G0060
	PH01001553G0030
	PH01001556G0410
	PH01001565G0410
	PH01001577G0460
	PH01001584G0250
	PH01001584G0260
	PH01001587G0250
	PH01001598G0080
	PH01001618G0390
	PH01001631G0280
	PH01001634G0220
	PH01001639G0320
	PH01001653G0140
	PH01001655G0120
	PH01001659G0280
	PH01001660G0260
	PH01001664G0150
	PH01001664G0170
	PH01001670G0080
	PH01001681G0050
	PH01001686G0450
	PH01001687G0160
	PH01001693G0200
	PH01001734G0300
	PH01001742G0110
	PH01001742G0240
	PH01001751G0140
	PH01001765G0340
	PH01001775G0210
	PH01001812G0230
	PH01001827G0140
	PH01001843G0020
	PH01001858G0020
	PH01001866G0450
	PH01001901G0050
	PH01001902G0010
	PH01001904G0240
	PH01001919G0170
	PH01001939G0290
	PH01001959G0040
	PH01001962G0120
	PH01001983G0140
	PH01001988G0330
	PH01002000G0440
	PH01002002G0040
	PH01002108G0170
	PH01002132G0230
	PH01002152G0050
	PH01002164G0210
	PH01002174G0060
	PH01002195G0330
	PH01002204G0030
	PH01002207G0310
	PH01002212G0070
	PH01002236G0220
	PH01002268G0060
	PH01002269G0120
	PH01002288G0050
	PH01002316G0200
	PH01002317G0040
	PH01002322G0260
	PH01002340G0040
	PH01002371G0150
	PH01002375G0200
	PH01002398G0060
	PH01002405G0050
	PH01002407G0090
	PH01002414G0110
	PH01002424G0100
	PH01002433G0160
	PH01002440G0140
	PH01002440G0400
	PH01002448G0200
	PH01002470G0130
	PH01002527G0200
	PH01002539G0120
	PH01002540G0050
	PH01002546G0390
	PH01002550G0300
	PH01002561G0120
	PH01002562G0200
	PH01002565G0100
	PH01002567G0200
	PH01002597G0100
	PH01002608G0210
	PH01002612G0130
	PH01002634G0020
	PH01002639G0140
	PH01002641G0320
	PH01002643G0070
	PH01002667G0150
	PH01002673G0070
	PH01002674G0050
	PH01002682G0280
	PH01002686G0170
	PH01002699G0070
	PH01002704G0080
	PH01002705G0040
	PH01002718G0100
	PH01002721G0170
	PH01002729G0130
	PH01002736G0210
	PH01002754G0150
	PH01002759G0110
	PH01002759G0120
	PH01002763G0120
	PH01002770G0110
	PH01002782G0190
	PH01002831G0140
	PH01002845G0100
	PH01002845G0120
	PH01002860G0170
	PH01002871G0220
	PH01002878G0170
	PH01002884G0130
	PH01002919G0240
	PH01002921G0180
	PH01002934G0080
	PH01002944G0220
	PH01002945G0240
	PH01002948G0030
	PH01002960G0150
	PH01002962G0040
	PH01002989G0070
	PH01002996G0020
	PH01003031G0070
	PH01003036G0230
	PH01003051G0090
	PH01003065G0040
	PH01003086G0220
	PH01003110G0190
	PH01003111G0080
	PH01003111G0090
	PH01003146G0100
	PH01003148G0100
	PH01003175G0220
	PH01003206G0080
	PH01003215G0050
	PH01003222G0240
	PH01003239G0150
	PH01003244G0020
	PH01003277G0010
	PH01003308G0210
	PH01003318G0130
	PH01003390G0010
	PH01003395G0030
	PH01003454G0110
	PH01003477G0090
	PH01003483G0140
	PH01003535G0180
	PH01003600G0090
	PH01003628G0170
	PH01003628G0180
	PH01003638G0120
	PH01003663G0220
	PH01003664G0130
	PH01003671G0100
	PH01003683G0160
	PH01003720G0070
	PH01003738G0030
	PH01003751G0100
	PH01003786G0140
	PH01003804G0130
	PH01003818G0120
	PH01003830G0150
	PH01003847G0060
	PH01003847G0080
	PH01003880G0040
	PH01003898G0090
	PH01003937G0060
	PH01003954G0110
	PH01004024G0040
	PH01004034G0030
	PH01004039G0050
	PH01004039G0060
	PH01004059G0020
	PH01004069G0090
	PH01004085G0080
	PH01004106G0180
	PH01004130G0170
	PH01004200G0090
	PH01004213G0030
	PH01004221G0090
	PH01004247G0080
	PH01004313G0130
	PH01004341G0010
	PH01004361G0020
	PH01004414G0070
	PH01004414G0080
	PH01004484G0060
	PH01004502G0130
	PH01004571G0090
	PH01004706G0010
	PH01004706G0160
	PH01004707G0070
	PH01004816G0120
	PH01004879G0020
	PH01005077G0060
	PH01005212G0050
	PH01005223G0070
	PH01005276G0040
	PH01005336G0010
	PH01005374G0050
	PH01005398G0080
	PH01005403G0080
	PH01005426G0050
	PH01005464G0050
	PH01005467G0050
	PH01005732G0060
	PH01006044G0030
	PH01006052G0030
	PH01006080G0010
	PH01006175G0030
	PH01006286G0010
	PH01006391G0040
	PH01006470G0010
	PH01006750G0030
	PH01006816G0070
	PH01007031G0020
	PH01007143G0030
	PH01007191G0040
	PH01007418G0020
	PH01007848G0020
	PH01007980G0020
	PH01008646G0020
	PH01009771G0010
	PH01010875G0010
	PH01019809G0010
	PH01033360G0010
	PH01042582G0010
	PH01048430G0010
	PH01050322G0010
	PH01050909G0010
	PH01053188G0010
	PH01085544G0010
	PH01094017G0010
	PH01142194G0010
	PH01151607G0010
	PH01153588G0010
	PH01156052G0010
	PH01157414G0010
	PH01174443G0010
	PH01180262G0010
	PH01229771G0010
	PH01239708G0010
	PH01240917G0010
	PH01242110G0010
	PH01252287G0010

## Sheet: 0.5H
	528 elements included exclusively in "0.5H":
	PH01000000G1880
	PH01000000G2120
	PH01000000G3110
	PH01000000G5570
	PH01000001G1300
	PH01000001G1670
	PH01000001G3710
	PH01000003G0100
	PH01000003G0190
	PH01000004G1140
	PH01000004G2210
	PH01000006G2220
	PH01000007G3080
	PH01000009G0890
	PH01000009G1940
	PH01000009G2920
	PH01000012G1040
	PH01000012G1560
	PH01000014G1410
	PH01000015G0390
	PH01000016G0340
	PH01000018G1570
	PH01000022G1190
	PH01000023G1870
	PH01000024G2110
	PH01000025G0960
	PH01000028G1230
	PH01000028G1600
	PH01000032G1580
	PH01000034G1470
	PH01000035G0990
	PH01000040G1380
	PH01000043G2100
	PH01000044G0800
	PH01000045G2120
	PH01000048G1300
	PH01000051G0440
	PH01000053G1640
	PH01000054G0810
	PH01000054G2420
	PH01000055G1070
	PH01000056G1610
	PH01000056G1660
	PH01000057G1670
	PH01000057G1960
	PH01000058G0590
	PH01000059G1970
	PH01000059G2000
	PH01000062G1290
	PH01000063G1190
	PH01000064G1550
	PH01000065G2010
	PH01000066G1050
	PH01000070G1710
	PH01000076G2100
	PH01000078G1450
	PH01000079G1090
	PH01000081G1510
	PH01000087G0360
	PH01000092G1060
	PH01000092G1180
	PH01000098G1880
	PH01000103G0240
	PH01000109G1530
	PH01000112G0040
	PH01000113G0400
	PH01000115G0630
	PH01000122G0950
	PH01000127G0540
	PH01000127G1020
	PH01000129G0800
	PH01000131G1060
	PH01000131G1230
	PH01000131G1240
	PH01000136G1320
	PH01000142G0190
	PH01000144G1050
	PH01000145G0150
	PH01000145G1120
	PH01000145G1320
	PH01000146G0460
	PH01000148G1280
	PH01000157G1310
	PH01000162G1230
	PH01000164G0260
	PH01000165G0390
	PH01000165G0400
	PH01000167G0190
	PH01000169G1360
	PH01000170G0120
	PH01000171G0880
	PH01000183G0480
	PH01000192G0550
	PH01000192G1330
	PH01000198G0370
	PH01000204G0350
	PH01000204G0740
	PH01000206G0260
	PH01000207G1080
	PH01000210G0120
	PH01000210G0740
	PH01000213G1420
	PH01000229G0700
	PH01000233G0920
	PH01000235G0230
	PH01000243G0640
	PH01000254G0110
	PH01000254G0870
	PH01000256G0230
	PH01000264G0320
	PH01000265G0860
	PH01000265G1120
	PH01000269G0350
	PH01000270G0670
	PH01000272G0180
	PH01000272G1140
	PH01000279G0930
	PH01000280G1410
	PH01000281G0240
	PH01000283G0010
	PH01000286G0640
	PH01000289G0740
	PH01000291G0880
	PH01000295G0880
	PH01000297G0530
	PH01000297G0550
	PH01000299G1220
	PH01000300G0960
	PH01000300G0970
	PH01000303G0870
	PH01000306G0810
	PH01000306G0940
	PH01000307G1030
	PH01000308G0910
	PH01000309G0040
	PH01000323G0230
	PH01000326G0160
	PH01000346G0560
	PH01000347G1160
	PH01000351G0270
	PH01000355G0880
	PH01000361G0580
	PH01000362G0340
	PH01000365G1190
	PH01000385G0180
	PH01000387G0590
	PH01000394G0510
	PH01000397G0710
	PH01000397G0880
	PH01000401G0180
	PH01000407G0210
	PH01000409G0550
	PH01000410G0020
	PH01000410G1010
	PH01000412G0240
	PH01000415G0090
	PH01000427G0500
	PH01000431G0330
	PH01000432G0250
	PH01000437G0390
	PH01000437G0640
	PH01000439G0620
	PH01000444G0700
	PH01000460G0520
	PH01000462G0290
	PH01000466G0310
	PH01000478G0320
	PH01000496G0570
	PH01000503G0270
	PH01000504G0300
	PH01000504G0480
	PH01000506G0450
	PH01000508G0100
	PH01000513G0730
	PH01000523G0700
	PH01000524G0520
	PH01000525G0180
	PH01000527G0500
	PH01000533G0850
	PH01000534G0840
	PH01000535G0100
	PH01000537G0680
	PH01000543G0370
	PH01000547G0650
	PH01000550G0160
	PH01000555G0340
	PH01000559G0630
	PH01000562G0040
	PH01000566G0350
	PH01000578G0480
	PH01000598G0500
	PH01000609G0540
	PH01000634G0370
	PH01000642G0700
	PH01000643G0660
	PH01000645G0150
	PH01000648G0610
	PH01000659G0050
	PH01000662G0740
	PH01000679G0330
	PH01000692G0520
	PH01000697G0770
	PH01000699G0370
	PH01000716G0440
	PH01000716G0640
	PH01000718G0350
	PH01000722G0010
	PH01000725G0080
	PH01000729G0470
	PH01000732G0650
	PH01000741G0460
	PH01000761G0570
	PH01000764G0670
	PH01000768G0220
	PH01000783G0330
	PH01000783G0760
	PH01000814G0260
	PH01000816G0480
	PH01000817G0260
	PH01000823G0740
	PH01000826G0110
	PH01000841G0400
	PH01000842G0220
	PH01000850G0270
	PH01000877G0160
	PH01000878G0460
	PH01000888G0360
	PH01000890G0070
	PH01000897G0690
	PH01000912G0430
	PH01000914G0450
	PH01000916G0030
	PH01000925G0400
	PH01000926G0660
	PH01000929G0400
	PH01000942G0480
	PH01000943G0090
	PH01000946G0230
	PH01000952G0050
	PH01000954G0450
	PH01000964G0310
	PH01000967G0490
	PH01000970G0650
	PH01000976G0460
	PH01000980G0530
	PH01000994G0680
	PH01001020G0340
	PH01001024G0220
	PH01001036G0400
	PH01001037G0370
	PH01001038G0080
	PH01001038G0430
	PH01001042G0700
	PH01001050G0360
	PH01001050G0370
	PH01001053G0160
	PH01001069G0370
	PH01001070G0420
	PH01001078G0280
	PH01001080G0390
	PH01001080G0410
	PH01001094G0060
	PH01001098G0490
	PH01001102G0470
	PH01001105G0210
	PH01001115G0330
	PH01001115G0660
	PH01001119G0310
	PH01001155G0070
	PH01001155G0090
	PH01001156G0500
	PH01001178G0310
	PH01001182G0030
	PH01001183G0400
	PH01001184G0450
	PH01001203G0550
	PH01001208G0070
	PH01001210G0240
	PH01001214G0240
	PH01001215G0410
	PH01001219G0530
	PH01001226G0340
	PH01001228G0390
	PH01001235G0240
	PH01001239G0620
	PH01001262G0230
	PH01001262G0550
	PH01001300G0270
	PH01001317G0310
	PH01001328G0400
	PH01001333G0210
	PH01001339G0360
	PH01001339G0500
	PH01001343G0490
	PH01001365G0510
	PH01001378G0550
	PH01001385G0280
	PH01001420G0140
	PH01001440G0510
	PH01001442G0030
	PH01001444G0090
	PH01001450G0470
	PH01001451G0150
	PH01001473G0140
	PH01001475G0470
	PH01001492G0310
	PH01001494G0360
	PH01001496G0260
	PH01001498G0440
	PH01001501G0200
	PH01001509G0440
	PH01001530G0300
	PH01001536G0420
	PH01001538G0090
	PH01001542G0200
	PH01001549G0080
	PH01001552G0320
	PH01001554G0110
	PH01001556G0150
	PH01001567G0330
	PH01001574G0260
	PH01001577G0100
	PH01001579G0450
	PH01001590G0460
	PH01001609G0120
	PH01001610G0500
	PH01001619G0300
	PH01001621G0310
	PH01001622G0130
	PH01001632G0180
	PH01001636G0050
	PH01001641G0270
	PH01001671G0060
	PH01001678G0190
	PH01001689G0140
	PH01001700G0160
	PH01001707G0440
	PH01001732G0070
	PH01001737G0510
	PH01001738G0330
	PH01001741G0220
	PH01001743G0120
	PH01001767G0010
	PH01001767G0110
	PH01001783G0100
	PH01001800G0090
	PH01001806G0480
	PH01001820G0320
	PH01001865G0090
	PH01001866G0100
	PH01001883G0330
	PH01001895G0250
	PH01001898G0030
	PH01001907G0360
	PH01001914G0090
	PH01001928G0180
	PH01001948G0190
	PH01001967G0120
	PH01001967G0170
	PH01001976G0110
	PH01001976G0230
	PH01001976G0240
	PH01001979G0320
	PH01001993G0120
	PH01001996G0080
	PH01002002G0020
	PH01002023G0130
	PH01002041G0310
	PH01002049G0090
	PH01002057G0300
	PH01002075G0050
	PH01002105G0310
	PH01002112G0300
	PH01002117G0160
	PH01002118G0220
	PH01002121G0220
	PH01002169G0130
	PH01002185G0050
	PH01002189G0090
	PH01002190G0130
	PH01002222G0260
	PH01002246G0240
	PH01002277G0080
	PH01002279G0250
	PH01002308G0080
	PH01002345G0010
	PH01002352G0020
	PH01002354G0130
	PH01002377G0200
	PH01002389G0090
	PH01002422G0220
	PH01002430G0110
	PH01002488G0280
	PH01002502G0290
	PH01002524G0210
	PH01002525G0120
	PH01002532G0050
	PH01002538G0240
	PH01002584G0160
	PH01002584G0240
	PH01002595G0160
	PH01002617G0110
	PH01002626G0200
	PH01002640G0130
	PH01002652G0230
	PH01002672G0100
	PH01002677G0230
	PH01002698G0240
	PH01002699G0210
	PH01002709G0230
	PH01002777G0100
	PH01002785G0030
	PH01002830G0070
	PH01002838G0170
	PH01002838G0190
	PH01002856G0160
	PH01002856G0240
	PH01002931G0070
	PH01002950G0190
	PH01002972G0240
	PH01002984G0100
	PH01002984G0160
	PH01002987G0150
	PH01002995G0150
	PH01003057G0080
	PH01003092G0070
	PH01003096G0110
	PH01003126G0090
	PH01003150G0240
	PH01003158G0110
	PH01003175G0090
	PH01003175G0160
	PH01003178G0060
	PH01003192G0230
	PH01003207G0090
	PH01003235G0090
	PH01003240G0030
	PH01003344G0170
	PH01003394G0110
	PH01003431G0250
	PH01003439G0130
	PH01003518G0200
	PH01003609G0110
	PH01003614G0140
	PH01003622G0210
	PH01003644G0180
	PH01003685G0220
	PH01003695G0340
	PH01003703G0160
	PH01003761G0190
	PH01003778G0160
	PH01003854G0140
	PH01003906G0130
	PH01003908G0140
	PH01003957G0030
	PH01003981G0140
	PH01004022G0080
	PH01004027G0130
	PH01004038G0030
	PH01004048G0080
	PH01004108G0090
	PH01004119G0140
	PH01004214G0060
	PH01004260G0140
	PH01004326G0140
	PH01004379G0050
	PH01004425G0040
	PH01004437G0120
	PH01004442G0080
	PH01004514G0010
	PH01004523G0030
	PH01004535G0080
	PH01004611G0100
	PH01004673G0150
	PH01004721G0070
	PH01004804G0020
	PH01004857G0080
	PH01005057G0010
	PH01005154G0100
	PH01005243G0060
	PH01005265G0030
	PH01005398G0060
	PH01005472G0050
	PH01005523G0020
	PH01005566G0100
	PH01005629G0080
	PH01005647G0060
	PH01005855G0010
	PH01005910G0050
	PH01005978G0070
	PH01006031G0030
	PH01006047G0020
	PH01006104G0030
	PH01006136G0070
	PH01006347G0010
	PH01006483G0010
	PH01006489G0020
	PH01006816G0060
	PH01006950G0060
	PH01006991G0010
	PH01007114G0040
	PH01007162G0030
	PH01007217G0030
	PH01007294G0020
	PH01007476G0010
	PH01007776G0010
	PH01008653G0010
	PH01009338G0010
	PH01010123G0010
	PH01056526G0010
	PH01080423G0010
	PH01085796G0010
	PH01148793G0010
	PH01152892G0010
	PH01156689G0010
	PH01159374G0010
	PH01161873G0010
	PH01167393G0010
	PH01168752G0010
	PH01172213G0010
	PH01185870G0010
	PH01197141G0010
	PH01205650G0010
	PH01221966G0010
	PH01221989G0010
	PH01257373G0010
	PH01258086G0010
	PH01266783G0010
